1 **Title**

2 Structural insights into substrate recognition by the SOCS2 E3 ubiquitin ligase

3

4 **Authors**

5 Wei-Wei Kung, Sarath Ramachandran, Nikolai Makukhin, Elvira Bruno, Alessio Ciulli\*

6

7 **Address**

8 Division of Biological Chemistry and Drug Discovery, School of Life Sciences, University of

9 Dundee, James Black Centre, Dow Street, Dundee, DD1 5EH, United Kingdom

10

11 **Abstract**

12 The suppressor of cytokine signaling 2 (SOCS2) acts as substrate recognition subunit of a  
13 Cullin5 E3 ubiquitin ligase complex. SOCS2 binds to phosphotyrosine-modified epitopes  
14 as degrons for ubiquitination and proteasomal degradation, yet the molecular basis of  
15 substrate recognition has remained elusive. We solved cocrystal structures of SOCS2-  
16 ElonginB-ElonginC in complex with phosphorylated peptides from substrates growth  
17 hormone receptor (GHR-pY595) and erythropoietin receptor (EpoR-pY426) at 1.98 Å  
18 and 2.69 Å, respectively. Both peptides bind in an extended conformation recapitulating  
19 the canonical SH2 domain-pY pose, yet capture different conformations of the EF loop via  
20 specific hydrophobic interactions. The flexible BG loop, for the first time fully defined in the  
21 electron density, does not contact the substrate degrons directly. Cancer-associated SNPs  
22 located around the pY pocket weaken substrate-binding affinity in biophysical assays. Our  
23 findings reveal insights into substrate recognition and specificity by SOCS2, and provide a  
24 blueprint for small molecule ligand design.

25

26 \* E-mail: [a.ciulli@dundee.ac.uk](mailto:a.ciulli@dundee.ac.uk)

27 ORCID ID: 0000-0002-8654-1670

28

## 29 Introduction

30 Cytokines are small glycoproteins that play important roles in the differentiation,  
31 development and function of lymphoid and myeloid cells <sup>1</sup>. The Janus kinase (JAK) –  
32 signal transducer and activator of transcription (STAT) signaling pathway plays a critical  
33 role enabling cells to respond to specific cytokines by regulating gene expression.  
34 Suppressor of cytokine signalling (SOCS) proteins, which comprise of cytokine inducible  
35 SH2-containing protein (CIS) and SOCS1 – SOCS7, negatively regulate cytokine  
36 receptors and inhibit the JAK-STAT signaling pathway <sup>2</sup>.

37

38 SOCS proteins share a conserved domain architecture comprising of an N-terminal  
39 extended SH2 subdomain (ESS) that is associates with substrate interaction <sup>3</sup>, followed by  
40 a central Src-homology 2 (SH2) domain that recognizes a phosphotyrosine (pY) containing  
41 sequence <sup>4</sup>, and a C-terminal SOCS box that interacts with the adaptor ElonginB-ElonginC  
42 complex (EloBC) <sup>5-7</sup>. All SOCS proteins bind to EloBC and recruit Cullin5 with high  
43 specificity, forming different SOCS-EloBC-Cullin5-Rbx2 (CRL5<sup>SOCS</sup>) E3 ligases that  
44 catalyse ubiquitin transfer and subsequent proteasomal degradation of specific substrates,  
45 as a mechanism to regulate diverse biological processes <sup>8-11</sup>. SOCS proteins serve as  
46 substrate recognition modules that impart substrate specificity to each CRL5<sup>SOCS</sup> E3  
47 complex.

48

49 Expression of SOCS proteins is induced by cytokine stimulation. Upon cytokine binding to  
50 a receptor, receptors oligomerize resulting in activation of the JAK family kinases that  
51 phosphorylate specific tyrosine residues on the receptor, including the docking site for the  
52 STAT proteins. The docked STAT proteins are sequentially phosphorylated, they dimerize  
53 and translocate into the nucleus, initiating gene transcription of several downstream  
54 proteins including the SOCS proteins. SOCS proteins suppress the JAK-STAT pathway  
55 via three distinct but often concomitant mechanisms: 1) KIR mediated direct JAK inhibition  
56 <sup>12,13</sup>; 2) Blocking STAT activation by competing for receptor pY sites <sup>14</sup>; 3) Targeting the  
57 receptor for proteasomal degradation via SOCS E3 ligase activity <sup>15,16</sup>. Some of the  
58 SOCS-substrate interactions have been structurally characterized, including SOCS1-JAK  
59 <sup>17</sup>, SOCS3-gp130 <sup>18,19</sup>, SOCS3-gp130-JAK2 <sup>20</sup> and SOCS6-cKit <sup>21</sup>.

60

61 SOCS2, one of the members of the SOCS family, is implicated in the disorders in immune  
62 system, central nervous system and cancer, and is thus emerging as a promising target for  
63 cancer therapies <sup>22-25</sup>. SOCS2 has been shown as the primary suppressor of growth

64 hormone (GH) pathway where a gigantism phenotype was observed in a *SOCS2*<sup>-/-</sup> mice<sup>26</sup>.  
65 Paradoxically, the *SOCS2* overexpressed transgenic mice also led to the same phenotype  
66 due to the *SOCS2*-mediated degradation of *SOCS1* and *SOCS3*<sup>27-29</sup>. Attenuation of GHR  
67 signalling relies on two phosphorylation sites at GHR that are recognised by *SOCS2*<sup>15,30</sup>.  
68 The pY487 site of GHR interacts with *CRL5*<sup>*SOCS2*</sup> E3 ligase that targets the GHR for  
69 ubiquitination and proteasomal degradation (Vesterlund *et al.*, 2011). A downstream  
70 pY595 site interacts with *SOCS2*, *STAT5b* and *SHP2* (*SH2* domain-containing  
71 phosphatase 2), enabling *SOCS2* to inhibit the signaling by blocking this receptor site from  
72 *STAT5b*<sup>14,31-33</sup>. Nonetheless, deletion of both sites is required to remove the inhibitory  
73 effect of *SOCS2* on the GH signaling<sup>15,30</sup>. Analysis of the binding affinity of *SOCS2* for  
74 these two phosphorylation sites of GHR reveals that the pY595 region exhibits a higher  
75 affinity towards *SOCS2* ( $K_D = 1.6 \mu\text{M}$ ) compared to pY487 region ( $K_D = 11.3 \mu\text{M}$ )<sup>3,34,35</sup>. An  
76 11-mer phosphorylated peptide spanning the pY595 region of GHR was sufficient to pull  
77 down the whole *CRL5*<sup>*SOCS2*</sup> complex from human cell lysates (Bulatov *et al.*, 2015). as well  
78 as *CIS*, the closest homologue to *SOCS2* from the same family, which plays a role in anti-  
79 tumor immunity controlling the differentiation of CD4 T helper cell, and the IL-2 and IL-4  
80 response<sup>34,36</sup>. In addition to GHR and *CIS*, other substrates have been identified to  
81 interact with *SOCS2*, including the erythropoietin receptor (*EpoR*) at pY426<sup>37</sup>, the leptin  
82 receptor at pY1077<sup>38</sup>, the epidermal growth factor receptor<sup>39</sup> and the insulin-like growth  
83 factor-I receptor<sup>40</sup>. The first crystal structure of *SOCS2*-*ElonginB*-*ElonginC* (*SBC*) was  
84 reported in 2006<sup>3</sup>, however the structural basis for substrate recognition to *SOCS2* has  
85 yet remained elusive.

86

87 Here, we determine the first co-crystal structures of *SBC* in complex with phosphorylated  
88 epitope peptides from its physiological targets GHR and *EpoR*. Our structures reveal the  
89 peptides are accommodated in an extended conformation to capture specific interactions  
90 with *SOCS2*. A key flexible region of *SOCS2*, known as the BG loop, is defined in the  
91 electron density for the first time and shown not to contact the bound substrates. Structural  
92 analyses supported by biophysical and mutagenesis investigations allowed identification of  
93 hotspot residues on the substrate degrons and functional elucidation of disease-relevant  
94 single nucleotide polymorphisms (SNPs) of *SOCS2*. Our findings provide fresh insights  
95 into the molecular recognition and selectivity between *SOCS2* and target substrates, and  
96 provide an important template for future structure-guided ligand design.

97

98 **Results**

99 To elucidate the molecular basis of substrate recognition by SOCS2, we subjected the  
100 SOCS2-ElonginB-ElonginC (SBC) complex to extensive co-crystallization trials with 11-  
101 residue phosphopeptides of either EpoR or GHR that span the regions surrounding Tyr426  
102 and Tyr 595 region, respectively. The affinity of SBC for EpoR\_pY426 ( $K_D$  of 4.8  $\mu$ M) and  
103 GHR\_pY595 ( $K_D$  of 1.6  $\mu$ M) was measured by isothermal titration calorimetry (ITC), and  
104 found to be consistent with the literature<sup>3,34</sup> (Figure S1). Attempts to co-crystallize wild-  
105 type SBC protein constructs<sup>3,34</sup> with either GHR or EpoR peptide were unsuccessful as  
106 resulting crystals only diffracted poorly. To improve crystal quality, we engineered a cluster  
107 of three mutations K115A/K117A/Q118A on SOCS2 that was predicted to significantly  
108 reduce surface conformational entropy and thermodynamically favor crystal packing<sup>41</sup>.  
109 Crystallization attempts with this new S<sup>KKQ</sup>BC triple-mutant construct  
110 (K115A/K117A/Q118A on SOCS2) eventually yielded high-resolution datasets.

111

#### 112 *SBC-EpoR co-crystal structure*

113 The structure of SBC in complex with EpoR\_pY426 peptide (SBC-EpoR) was solved and  
114 refined at 2.69 Å with 19.64 %  $R_{work}$  and 23.51 %  $R_{free}$  (Table 1). The overall subunit and  
115 domain arrangements of the SBC-EpoR structure is consistent with those of the apo SBC  
116 structures<sup>3,42,43</sup> (Figure 1a). Electron density for nine out of eleven non-terminal  
117 EpoR\_pY426 residues are well defined in the structure (Figure 1b). A classic SH2 domain-  
118 pY peptide interaction is observed where the pY residue is anchored at the pY pocket and  
119 the flanking residues are extending across the SH2 domain. The pY residue is tightly  
120 locked by an intricate hydrogen-bonding network formed by residues Arg73, Ser75, Ser76,  
121 Thr83 and Arg96 of SOCS2 (Figure 1c). Additional hydrogen bonds are formed along the  
122 backbone of EpoR\_pY426 peptide from Glu(-1) to Leu(+3) with SOCS2 residues Thr93,  
123 Asn94, Asp107 and one structural water (Figure 1d). Multiple hydrophobic interactions  
124 also support the binding of EpoR\_pY426 C-terminal residues, Ile(+2), Leu(+3) and Pro(+5)  
125 that are well accommodated within a hydrophobic patch created by Leu95, Leu106,  
126 Ser108, Ile109, Val112, Leu116 and Leu150 of SOCS2 (Figure 1e).

127

#### 128 *Crystal structure of SBC-GHR*

129 Encouraged by the success in solving an SBC-EpoR structure, to deepen understanding  
130 of the SOCS2 binding epitopes, we co-crystallized SBC with an 11-mer GHR\_pY595  
131 peptide (SBC-GHR) and solved the structure at 1.98 Å resolution with 21.73 %  $R_{work}$  and  
132 24.08%  $R_{free}$  (Table 1). In contrast to SBC-EpoR, which contains one protomer in the  
133 asymmetric unit, the SBC-GHR contains two copies of protomer. Alignment of these two

134 protomers via the backbone atoms of the EloB subunit reveals a hinge motion between the  
135 SH2 domain and the SOCS box (Figure S2). Such motion is a common feature in SOCS  
136 box and F-box containing proteins and it has been shown to be important as it facilitates  
137 accurate orientation and positioning of a target substrate protein relative to the  
138 multisubunit CRL complex<sup>42,44</sup>. Contrary to the SBC-EpoR complex, which contains a  
139 single copy of peptide per SH2 domain, two copies of GHR\_pY595 peptides were found  
140 binding per SH2 domain of SOCS2 (giving a total of four copies within the asymmetric  
141 unit). The two peptides run in an anti-parallel direction relative to each other across the  
142 SH2 domain, with well-defined electron density surrounding them both (Figure 2a). One of  
143 the peptides (referred to as peptide A hereafter) binds to SH2 domain in a canonical  
144 manner, where the pY is recognized by the positively charged pY pocket between the  
145 central  $\beta$  strands and  $\alpha$ A (Figure 2b). In contrast, the second peptide, peptide B, has its pY  
146 residue exposed to solvent and interacting only with His149 of SOCS2 (Figure 2b).

147

#### 148 *Specific interaction of the GHR\_pY595 phosphopeptide*

149 The unusual simultaneous binding observed for the GHR substrate peptide to SOCS2  
150 SH2 domain is imparted mainly by the region comprising Ser(+2) to Val(+6) from each  
151 peptide, which pair such that they form an anti-parallel beta sheet (Figure 2c). Extensive  
152 hydrogen bonds are formed between the backbone of the two peptides and backbone  
153 residues of SOCS2 and structural waters (Figure 2c). Further hydrophobic interactions  
154 appear to reinforce the binding, which impart specificity for GHR. The Ile(+3) and Ile(+5) of  
155 peptide A and peptide B settle in a hydrophobic patch of the SH2 domain formed by  
156 Leu95, Leu106, Ser108, Leu116 and Leu150 (Figure 2d). Another hydrophobic interaction  
157 that is distinct in SBC-GHR compared to SBC-EpoR is that formed by the side chain of  
158 Val(-3) of peptide A, that nicely fits into a hydrophobic pocket comprising of Thr88, Ala90,  
159 Thr93, Leu95 and Val148 from SOCS2 (Figure 2e). In the SBC-GHR structure, a cobalt  
160 ion is modeled at a positive peak that disappeared only at 21  $\sigma$  level in the unbiased Fo-Fc  
161 electron density map. This cobalt ion satisfies the formation of an octahedral coordination  
162 geometry with the side chains of His(+4) of peptide B, His149 of SOCS2 and with three  
163 surrounding water molecules (Figure 2f).

164

#### 165 *The BG loop of SOCS2 is observed for the first time in an open conformation*

166 SOCS2 is known to recognize two GHR binding sites at regions around pY487 and pY595,  
167 respectively. We therefore hypothesized that the two copies of the GHR peptides bound in  
168 the crystal structure might mimic a physiological folded conformation of GHR, presenting

169 each of the phosphorylated sites bound simultaneously to SOCS2. To test this hypothesis,  
170 we utilized an 11-residue GHR\_pY487 phosphopeptide (NIDFpYAQVSDI,  $K_D$  of 2.5  $\mu$ M by  
171 SPR), mixed with the GHR\_pY595 peptide and SBC in equimolar 1:1:1 ratio for co-  
172 crystallization. In this crystal structure (hereafter referred to as SBC-GHR<sub>2</sub>), still two copies  
173 of the GHR\_pY595 peptide, but no GHR\_pY487, are observed bound, yielding a structure  
174 very similar to the previous SBC-GHR structure (Figure 3). However, an important  
175 observation and different in SBC-GHR<sub>2</sub> compared to our other co-crystal structures was  
176 that the regions of SOCS2 corresponding to residues 134-162 is now fully visible in the  
177 electron density. This is unprecedented, and the first time this region, also called BG loop  
178 is structurally defined in full. The BG loop connects the  $\beta$ E and  $\beta$ F strands of an SH2  
179 domain (Figure 4a). The first part of the BG loop (residues 134-148 in SOCS2) differs in  
180 length and sequence among SOCS proteins (Figure 4b). We refer herein to this more  
181 variable region as the “specificity BG loop”, because its conformation, together with the  
182 configuration of the adjacent EF loop, governs accessibility of the pY binding pocket and  
183 contributes to substrate specificity in SH2 domains<sup>45</sup>. A particular region in the middle of  
184 the specificity BG loop (residues 136-145) is found to be disordered in all previously  
185 determined SOCS2 structures (PDB code, 2C9W, 4JGH and 5BO4) as well as our other  
186 co-crystal structures SBC-GHR and SBC-EpoR. In this SBC-GHR<sub>2</sub> structure, the BG loop  
187 is in an open conformation stabilised by crystal contacts, Pro140 (BG loop) to Arg186  
188 (SOCS box) and Pro140 (BG loop) to Ile90 (EloB), as clearly defined by the unbiased omit  
189 map at this region (Figure 4c, Table 1).

190

### 191 *Conformational changes of the EF and BG loop*

192 The configuration of the EF and BG loops play an important role in governing the  
193 accessibility of the binding pocket and specificity toward ligand binding<sup>45</sup>. A comparison of  
194 the SOCS2 structures in the presence and absence of peptides bound highlight  
195 conformational changes in EF (residue 107-116) and BG loop. In the absence of substrate  
196 peptide, the EF loop curls up placing the Ile110 and Cys111 at the hydrophobic SH2  
197 domain (Figure 5a). Upon binding of a substrate peptide, the EF loop opens up forming  
198 backbone interactions with GHR\_pY595 (Figure 5b), or rearranges itself to allow a specific  
199 interaction with EpoR\_pY426 (Figure 5c). This specific interaction between EF loop and  
200 EpoR\_pY426 involves hydrophobic interactions between Ile109 and Val112 of SOCS2,  
201 Val112 of a SOCS2 symmetry mate, and Pro(+5) of EpoR\_pY426, resulting in a  
202 differential binding mode from GHR\_pY595 to SOCS2. The BG loop of SOCS2 is



203 observed to be in an open conformation in SBC-GHR<sub>2</sub> and SBC-EpoR (disordered)  
204 structures. A superimposition of the two substrate complex structures suggest that the BG  
205 loop opens up further in SBC-GHR structure to accommodate two GHR peptides (Figure  
206 5d).

207

### 208 *Biophysical characterization of specificity between GHR\_pY595 and SOCS2*

209 To evaluate the specificity of the protein-peptide interaction in solution, we designed  
210 single-point mutations on the peptide first, and compared their binding to wild-type peptide  
211 by two orthogonal biophysical methods: a direct binding assay using SPR (SBC  
212 immobilized on the chip) and <sup>19</sup>F ligand-observed displacement NMR assays. In the <sup>19</sup>F  
213 NMR displacement assay, the fluorine signal of a purposely-designed reporter ligand (also  
214 referred to as spy molecule) was monitored as a mean to quantify the extent of the  
215 competition between the tested peptides and the spy molecule. A Carr-Purcell-Meibom-Gill  
216 (CPMG) pulse sequence was applied to estimate the spin-spin relaxation time (T<sub>2</sub>) of the  
217 spy molecule in the absence and presence of protein<sup>46-48</sup>. By adding competitor to disrupt  
218 the protein-spy interaction, the binding affinity of a competitor can be calculated based on  
219 the degree of displacement of the spy<sup>49</sup>. The spy molecule used in our assay is  
220 phosphate **3**, a fluorinated pY analogue that specifically binds to the pY pocket with a K<sub>D</sub> of  
221 40 μM (Scheme 1, and Figure S3). The two assays were found to be robust and reliable  
222 and measured K<sub>d</sub> values to correlate very well (Figure S4)

223

224 First, we focused on the unique interaction formed by Val(-3) of GHR\_pY595, which  
225 inserts into a small hydrophobic cavity of SOCS2 (Figure 2e). This interaction was  
226 investigated by mutating Val(-3) in the GHR peptide to Tyr and Arg, as representative  
227 bulky and charged residues, respectively. We hypothesized this structural change would  
228 disrupt the fit at this small hydrophobic pocket. Mutant V(-3)R exhibited between a 7- and  
229 a 10-fold loss of binding affinity to SBC, depending on the assay, suggesting the charged  
230 group strongly disrupts the interaction (Table 2). By contrast, the V(-3)Y was less  
231 disruptive, with only a two-fold loss in affinity.

232 Next, to map the relative importance and contribution of each individual amino acids to the  
233 binding affinity with SBC, alanine scan of the substrate peptides was invoked. The peptide  
234 sequences were designed such that individual amino acids were separately mutated into  
235 alanine except pY, which is known to abolish binding if mutated even to unphosphorylated  
236 Y<sup>34</sup>. The resulting library comprised of the original wild-type sequences, ten derivatives

237 from GHR\_pY595 and nine from EpoR\_pY426, and was characterized in parallel using  
238 SPR and  $^{19}\text{F}$  NMR competition assay (Table 3). Alanine substitution at pY(-3), pY(-1),  
239 pY(+3) and pY(+4) of the GHR\_pY595 resulted in at least two-fold weakened binding  
240 (increase in  $K_D$ ) compared to the wild type. In contrast, a similar 2-fold weakening in  
241 binding affinity was observed in the EpoR\_pY426 peptide upon alanine substitution at pY(-  
242 1), pY(+2) and pY(+3). These results are consistent with observations from our crystal  
243 structures that peptide-SOCS2 binding is mediated by hydrophobic interaction including  
244 pY(-3), pY(+3) and pY(+5) on the GHR\_pY595 and pY(+2) and pY(+3) on the  
245 EpoR\_pY426. The binding affinity for each peptide also dropped by at least two-fold with  
246 Ala substitution at pY(-1) position, indicating the importance of the residue just upstream of  
247 pY.

248

#### 249 *SNPs study*

250 Several single nucleotide polymorphisms (SNPs) on SOCS2 are reported in the Catalogue  
251 of Somatic Mutation in Cancer database (COSMIC) as potentially linked to cancers such  
252 as tumours of the lung, breast, and pancreas<sup>50</sup>. We thus next decided to characterize the  
253 interaction of selected SNP SOCS2 mutants with substrate peptides GHR\_pY595,  
254 EpoR\_pY426 and GHR\_pY487 by SPR. Inspection of our SBC co-crystal structures  
255 guided us to select five known SNPs: N94D, R96L, R96Q that are located in the pY-pocket  
256 and involved in direct recognition of pY; L106V that is highly conserved at the hydrophobic  
257 SH2 domain involving in substrate interaction; and C133Y that participates in the SH2  
258 hydrophobic core (Figure 6a). All mutant proteins expressed and purified similarly to wild-  
259 type, and the mutations did not appear to affect the structural integrity and solubility of the  
260 constructs, as observed by  $^1\text{H}$  NMR (Figure S5).

261 The L106V and C133Y mutations did not affect binding affinities except to the  
262 GHR\_pY487 peptide for which a 2-fold weaker binding was observed compared to wild  
263 type (Figure 6b). In contrast, the N94D and R96L mutations drastically impaired substrate  
264 binding, leading to almost undetectable binding response by SPR. Because of the low  
265 signal-to-noise, reliable  $K_D$  values could not be measured with these protein mutants. For  
266 the R96Q mutation no signal response was detected, suggesting that binding was  
267 completely abolished and highlighting the most disruptive of the mutations studies. In  
268 addition to SPR, the SNP mutants were characterized using  $^{19}\text{F}$  NMR by monitoring the  
269 signal contrast in the presence and absence of protein. L106V and C133Y exhibited  
270 similar contrast, 67% and 77%, comparable to wild type at 69 %, suggesting these  
271 mutations did not affect pY recognition. Mutations on N94 and R96 showed a substantial



272 disruption to pY recognition, resulting in a significant disruption of binding at around 20%  
273 contrast. Strikingly, the R96Q completely abolished binding, consistent with the SPR data  
274 (Figure 6c).  
275  
276

277 **Discussion**

278 SOCS2 is a substrate binding protein of the CRL5 E3 complex that negatively regulates  
279 the JAK-STAT signaling by targeting substrate receptors for degradation and blocking  
280 STAT5b activation by competing with receptor pY sites. The details of these interactions  
281 have remained elusive and to date structural information remained limited to apo SOCS2.  
282 Herein, we have disclosed two novel structures of the SBC in complex with substrate  
283 peptides EpoR\_pY426 and GHR\_pY595. Both peptides recapitulate a canonical substrate-  
284 binding mode to SH2 domain of SOCS2, but catch different hydrophobic interactions  
285 resulting in exclusive binding modes with distinct hydrophobic cavities in SOCS2.

286

287 The BG loop of SOCS2 had not been fully revealed in previous published structures. Here,  
288 we report an open conformation BG loop, which is contradictory to other SOCS structures  
289 with bound peptides, for example SOCS3:gp130 and SOCS6:c-kit<sup>19,21</sup>. In the SOCS3 and  
290 SOCS6 peptide-bound structures, the BG loop folds up as a hairpin interacting with the  
291 substrate peptide, forming a triple-stranded  $\beta$  sheet structure (Figure 7a,b). The  
292 corresponding BG loop region in SOCS2 is either fully disordered or in an open  
293 conformation (SBC-EpoR and SBC-GHR<sub>2</sub>), suggesting that this region does not participate  
294 in substrate recognition. Nevertheless, interestingly, a similar triple-stranded  $\beta$  sheet  
295 structure is observed in the SBC-GHR<sub>2</sub> structure, where the peptide B replaces the first  $\beta$ -  
296 sheet of the BG loop and makes backbone interactions with BG loop (Val148 and Leu150)  
297 and peptide A (Ser(+2) to Val(+6)) (Figure 7c).

298

299 The BG loop along with the EF loop forms a hydrophobic channel in SOCS3 and SOCS6.  
300 This channel imparts specificity and restricts the binding of substrates. In contrast the open  
301 conformation of BG loop in SOCS2 could be critical in enabling SOCS2 to accommodate a  
302 wider range of substrates including GHR, EpoR, SOCS1 and SOCS3 amongst others. A  
303 comparison of buried surface area of the substrate peptides among SOCS proteins, reveal  
304 that EpoR and GHR binds with SOCS2 with only 595 and 641  $\text{\AA}^2$ , respectively, in contrast  
305 to areas of 1714  $\text{\AA}^2$  for SOCS6/c-KIT and 1761  $\text{\AA}^2$  for SOCS3/gp130 complexes. Unlike  
306 SOCS3 and SOCS6 complex structures, the pY flanking residues from EpoR and GHR do  
307 not participate in extensive side-chain hydrogen bonding interactions. Together, these  
308 observations are consistent with greater binding affinities of SOCS3 and SOCS6  
309 substrates compared to SOCS2 substrates. The lower potency of affinity for SOCS2  
310 substrates could contribute to its relatively greater promiscuity to multiple substrates.

311

312 The observation of the dual-peptide binding mode to SOCS2 was unexpected, however is  
313 not unprecedented with SH2 domains, as reported previously with the tyrosine  
314 phosphatase SHP-2, which also contains a SH2 domain<sup>51</sup>. In the co-crystal structure of  
315 SHP-2:pY peptide solved by Zhang et al., one pY of the peptide is recognized at the pY  
316 pocket and the other one is solvent exposed as in our structures described herein.  
317 Besides, two peptides run antiparallel to each other and form an antiparallel four-stranded  
318  $\beta$  sheet with BG loop. Zhang *et al.* suggested that the dimerization of peptide binding in  
319 SHP-2 requires at least one pY containing peptide and demonstrates enhanced binding  
320 affinity to protein. For our SBC-GHR structure, despite preparing several protein-peptide  
321 samples for co-crystallization at 1:1 molar ratio, all dataset collected from crystals were  
322 consistent with a 1:2 (protein-peptide) binding mode.

323

324 We put forth two distinct models that might explain the dual peptide recognition mode and  
325 its role in specific tuning of GHR signaling response. First, a “cis” recognition mode, where  
326 the GHR tail folds back as a hairpin structure presenting two binding epitopes around  
327 distinct phosphorylation sites (e.g. pY487 and pY595) for recognition (Figure 8a).  
328 However, the crystallography data from our follow-up experiment as described in the SBC-  
329 GHR<sub>2</sub> structure is not consistent with this hypothesis, as two instances of the pY595  
330 peptide were found bound despite a molar ratio of 1:1 for pY487 and pY595 peptides  
331 being present in the co-crystallization buffer (Figure 3). However we cannot exclude that  
332 simultaneous recognition of the two distinct epitopes would require a loop of the same tail  
333 twisting back onto itself to enhance the binding affinity of second epitope. Alternatively, we  
334 envisage a “trans” recognition mode, where SOCS2 recognize two separate receptor tails  
335 of the activated dimerized GHR receptors at the cell membrane (Figure 8b). SOCS2 might  
336 additionally play a role as scaffold bringing two substrates in close proximity, for example  
337 by recruiting one instance of phosphorylated substrate to assist the binding of un-  
338 phosphorylated one for post-translational modification. This mechanism evokes potential  
339 similarities with some phosphodegrons which require two sites to be phosphorylated,  
340 utilizing a first kinase to “prime” phosphorylation events, followed by a second kinase for  
341 follow-on phosphorylation<sup>52</sup>. An example of such a mechanism is the  $\beta$ -catenin  
342 degradation mediated by the  $\beta$ -TrCP<sup>53</sup>. Further biophysical investigation is warranted to  
343 address the extent to which these potential mechanisms might be invoked for SOCS2  
344 function.

345

346 SOCS2 is an attractive therapeutic target due to its links to cancer, diabetes, neurological  
347 and inflammatory diseases <sup>23,24,54–58</sup>. Breast, lung, liver and ovarian cancer have been  
348 correlated with down-regulation in SOCS2 <sup>59–64</sup>. In addition to the JAK-STAT pathway, a  
349 recent study has identified the involvement of SOCS2 in the NF- $\kappa$ B (nuclear factor kappa-  
350 light-chain-enhancer of activated B cells) pathway that regulates the immune and  
351 inflammatory responses <sup>65,66</sup>. NF- $\kappa$ B is found to be constitutively activated in many types of  
352 cancer and influences a diverse array of pro-tumorigenic functions, therefore NF- $\kappa$ B plays  
353 an pivotal role in cancer initiation and progression <sup>67</sup>. SOCS2 negatively regulates TNF $\alpha$   
354 induced NF- $\kappa$ B activation by targeting NDR1, a serine-threonine kinases, for proteasomal  
355 degradation. Hence SOCS2 deficiency may lead to an increased level of NDR1, which  
356 was is reported to result in aggressive behaviour of PC3 prostate cancer cells <sup>65</sup>. These  
357 evidences highlight the potential in targeting SOCS2 for drug discovery for inflammation  
358 and cancer biology. We have revealed structural insights into the SOCS2-peptide  
359 interactions by X-ray crystallography and identified hotspot using alanine scanning,  
360 mutation study and SNPs study. This information provides a template to guide the  
361 structure-based rational design of SOCS2 ligands that are instrumental in the development  
362 of novel chemical tools to address biological question of SOCS2, and in the quest for  
363 novel small molecule ligands binding to SOCS2 as potential therapeutics. SOCS2 binders  
364 at the pY binding pocket can be used as inhibitors of the CRL5<sup>SOCS2</sup>, which would be  
365 expected to prevent degradation of target substrate receptors, thus prolonging the activity  
366 of cytokine signaling pathway and upregulating expression of endogenous STAT5b-  
367 responsive gene expression. In a distinct application, a SOCS2 binder could be used as  
368 E3 ligase ligand handle for designing new chemical degraders to hijack SOCS2 CRL  
369 activity and trigger the degradation of unwanted proteins inside cell <sup>68–70</sup>. This approach,  
370 also known as proteolysis targeting chimeras (PROTACs), offers the advantage of  
371 inducing rapid and selective intracellular depletion of the target protein, as opposed to  
372 mere blockade of a single interaction or activity, which pairs more closely to genetic target  
373 validation and often results in greater maximal efficacy of intervention in a signaling  
374 pathway. PROTAC-mediated protein degradation has been shown to occur at very low  
375 compound concentration (pM to nM range) also potentially allows targeting of intractable  
376 protein targets that are beyond the reach of conventional small-molecule approaches that  
377 require full occupancy of a target binding site e.g. receptor antagonists and enzyme inhibitors.  
378 A limited set of E3 ligases have been targeted so far for PROTACs, notably VHL <sup>71,72</sup> and  
379 cereblon <sup>73,74</sup>, so extending the approach to other ligandable E3 ligases would be an important  
380 advance to the field. Our peptide-bound co-crystal structures suggest that SOCS2 might be

381 ligandable and provide a blueprint for the rational structure-guided design of novel SOCS2  
382 inhibitors and SOCS2 ligand handles for PROTACs.  
383  
384  
385

## 386 **Materials and Methods**

### 387 *Cloning and protein expression*

388 The human SOCS2 (amino acids 32 – 198) and the ElonginB (amino acids 1 – 104) and  
389 ElonginC (amino acids 17 – 112) plasmids were used for protein expression as previously  
390 reported <sup>42</sup>, and as templates for mutagenesis. SOCS2 mutants with N94D, R96L, R96Q,  
391 L106V or C133Y mutation were introduced using a PCR-based method site-directed  
392 mutagenesis. SOCS2 wild type and mutants were co-expressed and purified as previously  
393 described <sup>34,42</sup>.

394

### 395 *Crystallization and structure determination of SBC-GHR*

396 To improve crystallization, surface entropy reducing mutations were introduced into  
397 SOCS2 construct (amino acids 32 – 198). Three mutation clusters (K63A/E64A/E67A;  
398 K113A and K115A/K117A/Q118A) were identified with the SER server <sup>41</sup>. SER-assisted  
399 crystallization attempts yielded crystals with the K115A/K117A/Q118A SOCS2-EloBC  
400 (S<sup>KKQ</sup>BC). Five times molar excess of GHR\_pY595 (PVPDpYTSIHIV-amide) was  
401 incubated with S<sup>KKQ</sup>BC, followed by removing unbound peptide using a protein  
402 concentrator. Sample was concentrated to 22 mg/ml with an additional 0.1 M of sodium  
403 cacodylated pH7.2 added to the sample. Diffraction-quality crystals were obtained with  
404 0.005 M Cobalt (II) chloride, 0.1 M MES pH 6.5, 1.0 M ammonium sulphate at 4 °C using  
405 hanging drop vapour diffusion method at 2:1 protein:precipitant ratio. Crystals were cryo-  
406 protected using 20% MPD prior to vitrification in liquid nitrogen.

407

408 Diffraction data were collected at 100 K at Diamond Light Source beamline i04 using  
409 Pilatus 6M-F detector at 0.98 Å wavelength. Indexing and integration was processed by  
410 XDS <sup>75</sup> and scaling and merging with AIMLESS within the CCP4 program suite <sup>76,77</sup>. The  
411 experimental phases was obtained by identifying positions of arsenic atom using MR-SAD  
412 Phases in the PHENIX software suite <sup>78,79</sup> with a model provided. The provided template  
413 was a lower resolution SBC-GHR co-crystal obtained previously (unpublished work). The  
414 structure was reconstructed by AutoBuild <sup>80,81</sup> and manually built in Coot <sup>82</sup>. The resulting  
415 structure was refined iteratively with REFMAC5 <sup>83</sup>

416

### 417 *Crystallization and structure determination of SBC-EpoR*

418 Five times molar excess of EpoR\_pY426 (ASFEPYTILDPS-amide) was incubated with  
419 S<sup>KKQ</sup>BC (5mg/ml). Unbound peptide was removed by a protein concentrator (sartorius  
420 Vivaspin) while the mixture was concentrated to 20 mg/ml concentration. Sodium



421 cacodylate pH7.2 was added to a final concentration of 0.1M prior to crystallisation.  
422 Crystallisation drops were set up in a ratio of 1:1 protein:precipitant in 18% ethanol, 0.1M  
423 HEPES pH7.5, 0.1M MgCl<sub>2</sub> using hanging drop at 4°C. Crystals were cryo-protected using  
424 20 % PEG400 prior to flash-cooled.

425

426 Diffraction data were collected at 100 K on beamline i24 at Diamond Light Source. Data  
427 were recorded to Pilatus3 6M-F detector at 0.97 Å wavelength. Data were indexed,  
428 integrated, and reduced using XDS<sup>75</sup> and AIMLESS<sup>76,77</sup>. The phase was obtained by  
429 molecular replacement (MR) using Phaser<sup>79</sup> with the coordinates of SOCS2-EloB-EloC  
430 (PBD ID: 2C9W) as a search model. The presence of the EpoR\_pY426 was observed in  
431 the initial electron density map. Model building was conducted manually with Coot<sup>82</sup> and  
432 refined with cycles of retrained refinement with REFMAC5<sup>83</sup>.

433

#### 434 *Crystallization and structure determination of SBC-GHR<sub>2</sub>*

435 GHR\_pY595 (PVPDpYTSIHIV-amide) and GHR\_pY487 (NIDFpYAQVSDI-amide) were  
436 mixed with S<sup>KKQ</sup>BC at 1:1:1 stoichiometric ratio with a final concentration of 20 mg/ml and  
437 additional 0.1 M sodium cacodylate pH7.2. Drops of the complex were mixed 2:1 with  
438 0.005 M cobalt chloride, 0.1 M MES pH6.5 and 1.0 M ammonium sulphate in the sitting-  
439 drop vapor diffusion format at 4°C. 20 % MPD was applied to crystal before flash-cooling.

440

441 Data collection of the SBC-GHR<sub>2</sub> co-crystal was at 100 K on beamline i24 at Diamond  
442 Light Source. Images were indexed, integrated and reduced using XDS<sup>75</sup> and AIMLESS  
443<sup>76,77</sup>. A molecular replacement solution was obtained by Phaser<sup>79</sup> using SBC-GHR as  
444 search model. Refinement was performed using REFMAC5<sup>83</sup> and model building was  
445 performed in COOT<sup>82</sup>.

446

#### 447 *Synthetic details*

448 All chemicals, unless otherwise stated were commercially available and used without  
449 further purification. Solvents were anhydrous and reactions performed under positive  
450 pressure of nitrogen. Flash column chromatography was performed using a Teledyne Isco  
451 Combiflash Rf or Rf200i. As prepacked columns RediSep Rf Normal Phase Disposable  
452 Columns were used. NMR spectra were recorded on a Bruker 500 Ultrashield. <sup>13</sup>C spectra  
453 were <sup>1</sup>H decoupled. Chemical shifts (δ) are reported in ppm relative to solvent (CD<sub>3</sub>OD: δ<sub>H</sub>  
454 = 3.31ppm, δ<sub>C</sub> = 49.0 ppm) as internal standard. Low resolution MS and analytical HPLC  
455 traces were recorded on an Agilent Technologies 1200 series HPLC connected to an

456 Agilent Technologies 6130 quadrupole LC/MS, connected to an Agilent diode array  
457 detector. The column used was a Waters XBridge column (50 mm x 2.1 mm, 3.5  $\mu$ m  
458 particle size) and the compounds were eluted with a gradient of 5–95% acetonitrile/water  
459 + 0.1% formic acid over 3 min. Preparative HPLC was performed on a Gilson Preparative  
460 HPLC System with a Waters X-Bridge C18 column (100 mm x 19 mm; 5  $\mu$ m particle size)  
461 and a gradient of 5 % to 95 % acetonitrile in water over 10 min, flow 25 mL/min, with 0.1 %  
462 formic acid in the aqueous phase.

463

464 *Cbz-O-bis(dimethylamino)phosphono)-L-tyrosine (1)*

465 *O-bis(dimethylamino)phosphono)-L-tyrosine*<sup>84</sup> (485 mg, 1.54 mmol) and NaHCO<sub>3</sub> (260  
466 mg, 3.1 mmol) were dissolved in the mixture THF/H<sub>2</sub>O = 1:1 (10 mL) and *N-*  
467 (benzyloxycarbonyloxy)succinimide (383 mg, 1.54 mmol) was added. The reaction mixture  
468 was stirred at room temperature overnight. After the addition of 5% NaHSO<sub>4</sub> the product  
469 was extracted with ethyl acetate, washed with brine, dried over MgSO<sub>4</sub>, concentrated by  
470 rotary evaporation under reduced pressure. After drying, *Cbz-O-*  
471 *bis(dimethylamino)phosphono)-L-tyrosine 1* (620 mg, 89%) was obtained as pale yellow.  
472 <sup>1</sup>H NMR (CD<sub>3</sub>OD): 2.69 (d, *J* = 10.1 Hz, 12H), 2.92 (dd, *J* = 14.0, 9.3 Hz, 1H), 3.18 (dd, *J* =  
473 14.0, 4.9 Hz, 1H), 4.40 (dd, *J* = 4.9, 9.3 Hz, 1H), 5.03 (s, 2H), 7.06 (d, *J* = 8.5 Hz, 2H),  
474 7.21 (d, *J* = 8.5 Hz, 2H), 7.25-7.36 (m, 5H). <sup>31</sup>P NMR (CD<sub>3</sub>OD): 18.2.

475

476 *(S)-2-amino-3-(4-((bis(dimethylamino)phosphoryl)oxy)phenyl)-N-methylpropanamide (2)*

477 To a mixture of the compound **1** (160 mg, 0.35 mmol), HATU (135 mg, 0.35 mmol), HOAt  
478 (48 mg, 0.35 mmol) and DIPEA (150  $\mu$ L, 1 mmol) in DMF (1 mL), 2M methylamine solution  
479 in THF (0.5 mL) was added under stirring at room temperature. After two hours, LC-MS  
480 analysis showed complete conversion of the starting material and formation of the desired  
481 product. The mixture was diluted with ethyl acetate, washed with 5% NaHSO<sub>4</sub>, brine, dried  
482 over MgSO<sub>4</sub>, concentrated by rotary evaporation under reduced pressure. The crude  
483 product was dissolved in the mixture ethanol/ethyl acetate= 1:1 (8 mL). Hydrogenation  
484 was carried out using H-Cube at 80 °C, Pd/C, 1 atm, at 1mL/min. The solvent was  
485 evaporated under vacuum to afford **2** (108 mg, 92%) which was directly used in the next  
486 step without any further purification. <sup>1</sup>H NMR (CD<sub>3</sub>OD): 2.66 (s, 3H), 2.71 (d, *J* = 10.1 Hz,  
487 12H), 2.81 (m, 1H), 2.96 (m, 1H), 3.51 (m, 1H), 7.09 (dd, *J* = 8.5, 1.0 Hz, 2H), 7.20 (d, *J* =  
488 8.5 Hz, 2H). <sup>31</sup>P NMR (CD<sub>3</sub>OD): 18.3.

489

490 (S)-4-(3-(methylamino)-3-oxo-2-(2,2,2-trifluoroacetamido)propyl)phenyl dihydrogen  
491 phosphate (**3**)

492 A solution of the compound **2** (80 mg, 0.24 mmol) and DIPEA (85  $\mu$ L, 0.48 mmol) in DCM  
493 (2 mL) was cooled to -78 °C, and trifluoroacetic anhydride (34  $\mu$ L, 0.24 mmol) was added.  
494 The reaction mixture was stirred 1h at -78 °C. After solvent evaporation the residue was  
495 dissolved in acetonitrile (0.5 mL) and 2M HCl was added (2 mL). The mixture was stirred  
496 at room temperature overnight until no presence of the starting materials was detected by  
497 LC-MS. The solvents were evaporated and residue was purified by HPLC to afford  
498 phosphate **3** (30 mg, 34%) as a white solid.  $^1\text{H}$  NMR ( $\text{CD}_3\text{OD}$ ): 2.69 (s, 3H), 2.96 (dd,  $J$  =  
499 13.8, 6.4 Hz, 1H), 3.15 (dd,  $J$  = 13.8, 6.4 Hz, 1H), 4.57 (dd,  $J$  = 8.8, 6.4 Hz, 1H), 7.13 (dd,  
500  $J$  = 8.5, 1.1 Hz, 2H), 7.22 (d,  $J$  = 8.5 Hz, 2H).  $^{13}\text{C}$  NMR ( $\text{CD}_3\text{OD}$ ): 26.3, 37.8, 56.5, 117.3  
501 (q,  $J$  = 286.7 Hz), 121.3 (d,  $J$  = 4.5 Hz), 131.3, 134.1, 151.9 (d,  $J$  = 6.8 Hz), 158.7 (q,  $J$  =  
502 37.5 Hz), 172.4.  $^{31}\text{P}$  NMR ( $\text{CD}_3\text{OD}$ ): 3.7.  $^{19}\text{F}$  NMR ( $\text{CD}_3\text{OD}$ ): -75.6.

503

504 *Peptide synthesis*

505 All peptides were prepared via solid-phase peptide synthesis on 10 mmol scale using  
506 standard Fmoc chemistry on Rink amide resin (0.68 mmol/g) on an INTAVIS ResPepSL  
507 automated peptide synthesizer. *O*-(dibenzylphosphono)-*N*-Fmoc-*L*-tyrosine was  
508 synthesised as described below. The peptides were cleaved with 2.5% triisopropylsilane  
509 and 2.5% water in TFA. The crude peptides were isolated from the cleavage mixture by  
510 precipitation with cold ether, dissolved in the mixture water/DMF=1/1 and purified by  
511 preparative HPLC under the following conditions: Waters X-Bridge C18 column (100 mm x  
512 19 mm; 5  $\mu$ m particle size), gradient of 5-95 % acetonitrile in water over 10 min, flow 25  
513 mL/min, with 0.1 % formic acid in the aqueous phase, UV detection at  $\lambda_{\text{obs}}$  = 190 and 210  
514 nm). The poor soluble peptides were purified according to the literature procedure<sup>85</sup>: the  
515 impurities were extracted by DCM from the solution of peptides in 20% acetic acid. The  
516 purity and identity of the peptides were determined by the analytical LCMS on an Agilent  
517 Technologies 1200 series HPLC connected to an Agilent Technologies 6130 quadrupole  
518 LC/MS linked to an Agilent diode array detector.

519

520 *O*-(dibenzylphosphono)-*N*-Fmoc-*L*-tyrosine

521 To a solution of Fmoc-tyrosine (2 g, 5 mmol) in anhydrous THF (12 mL) *N*-  
522 methylmorpholine (540  $\mu$ L, 5 mmol) and *tert*-butyldimethylsilyl chloride (740 mg, 4.9 mmol)  
523 were added. After 15 min 4,5-dicyanoimidazole (1.8 g, 15 mmol) and  
524 diisopropylphosphoramidite (3.4 mL, 10 mmol) were added and the reaction mixture was

525 stirred at room temperature for 4 h. After cooling to 0°C 70% *tert*-butyl hydroperoxide (2  
526 ml, 15 mmol) was introduced. After stirring for 2 h at 0°C, 10% Na<sub>2</sub>S<sub>2</sub>O<sub>5</sub> (20 ml) was added  
527 and stirring continued for one more hour. The product was extracted with ethyl acetate,  
528 washed with a 5% solution of KHSO<sub>4</sub>, brine, dried over MgSO<sub>4</sub>, concentrated by rotary  
529 evaporation under reduced pressure, and further purified by column chromatography on  
530 silica gel using a gradient elution of 0% to 10% of MeOH in DCM to afford *O*-  
531 (dibenzylphosphono)-*N*-Fmoc-*L*-tyrosine (3g, 90%) as a pale yellow solid. NMR spectra  
532 were in agreement with the published data <sup>86</sup>.

533

#### 534 *Isothermal titration calorimetry*

535 Experiments were performed with ITC200 instrument (Malvern) in 100mM HEPES pH7.5,  
536 50mM NaCl, 0.5mM TCEP at 298K stirring the sample at 750 rpm. The ITC titration  
537 consisted of 0.4 μL initial injection (discarded during data analysis) followed by 19 of 2 μL  
538 injections at 120 seconds interval between injections. The GHR\_pY595 peptide  
539 (PVPDpYTSIHIV-amide, 750 μM) and EpoR\_pY426 (ASFepYTILDPS-amide, 750 μM)  
540 were directly titrated into SBC (50 μM). Binding data was subtracted from a control titration  
541 where peptide was titrated into buffer, and fitted using a one-set-of-site binding model to  
542 obtain dissociation constants, binding enthalpy (ΔH), and stoichiometry (N) using MicroCal  
543 ITC-ORIGIN Analysis Software 7.0 (Malven).

544

#### 545 *Surface plasmon resonance*

546 Experiments were performed using Biacore T200 instrument (GH Healthcare) in 20 mM  
547 HEPES pH7.5, 150 mM NaCl, 1mM TCEP, 0.005 % Tween20 buffer at 10 °C. Biotinylated  
548 wild type SBC and mutants were immobilized onto a chip surface and injected a series of  
549 seven concentrations (0.08, 0.25, 0.7, 2.2, 6.7, 20 and 60 μM) of peptide across the  
550 sensor surface for 60 sec contact time and 120 sec disassociation time at 30 μl/min flow  
551 rate. Data analysis was carried out using Biacore Evaluation Software (GE Healthcare). All  
552 data were double-referenced for reference surface and blank injection. The processed  
553 sensograms were fit to a steady-state affinity using a 1:1 binding model for K<sub>D</sub> estimation.

554

#### 555 <sup>19</sup>F ligand NMR

556 Experiments were conducted using AV-500 MHz Bruker spectrometer equipped with a 5  
557 mm CPQCI 1H/19F/13C/15N/D Z-GRD cryoprobe) at 298 K. Spectra were recorded using  
558 a Carr-Purcell-Meiboom-Gill (CPMG) pulse sequence that attenuates broad resonances  
559 with an interpulse delay at 0.133 seconds for 80 scans. The transmitter frequency was

560 placed close to the resonance of  $O_1 = -35451$  Hz (-75.3 ppm). Protein was used at 5  $\mu$ M  
561 and spy molecule (phosphate **3**) was used at 100  $\mu$ M in buffer containing 20 mM HEPES  
562 pH8, 50 mM NaCl, 1mM DTT, 20 %  $D_2O$ . All NMR data were processed and analysed  
563 using TopSpin (Bruker).

564

565 Signal contrast between bound and free form of the spy is calculated as below

566

$$Contrast (\%) = \frac{Spy_{Free} - Spy_{Bound}}{Spy_{Free}}$$

567

568 where  $Spy_{free}$  is the peak integral or  $T_2$  of spy in the absence of protein, while  $Spy_{bound}$  is  
569 the signal of spy in complex with protein.

570

571 For competition studies, the percentage displacement is calculated as below

572

$$Displacement (\%) = \frac{Competitor - Spy_{Bound}}{Spy_{Free} - Spy_{Bound}}$$

573

574 where competitor is the peak integral of spy in the presence of competitor, protein and spy.

575

576 To calculate the dissociation constant of competitor ( $K_i$ ), assuming all other experimental  
577 conditions are identical in the absence and presence of competitor, the signal intensity is  
578 proportional to the concentration of protein-spy complex, and can be expressed as below

579 <sup>49</sup>

580

$$\frac{Signal(I)}{Signal(0)} = \frac{[E_0] + [L_0] + K_D - [EI] - \sqrt{([E_0] + [L_0] + K_D - [EI])^2 - 4([E_0] - [EI])[L_0]}}{[E_0] + [L_0] + K_D - \sqrt{([E_0] + [L_0] + K_D)^2 - 4[E_0][L_0]}}$$

581

582 where  $Signal(I)$  and  $Signal(0)$  are the fluorine intensities in the presence and absence of  
583 competitor, respectively.  $[E_0]$  is the total concentration of protein.  $[L_0]$  is the total  
584 concentration of ligand.  $[EL]$  is concentration of protein-ligand complex. From the observed  
585 ratio of signal intensity, the  $K_i$  can be calculated.

586

587

588 **Accession Code**

589 The coordinates and structure factors for SBC in complex with EpoR\_pY426 peptide,  
590 GHR\_pY595 peptide, and GHR2\_pY595 peptide have been deposited to the Protein Data  
591 Bank (PDB) with accession codes 6I4X, 6I5N, and 6I5J, respectively.

592

593 **Supplemental information**

594 Supplementary Figures S1–S5 are included.

595

596 **Acknowledgements**

597 This project has received funding from the European Research Council (ERC) under the  
598 European Union's Seventh Framework Programme (FP7/2007-2013) as a Starting Grant  
599 to A.C. (grant agreement No. ERC-2012-StG-311460 DrugE3CRLs). Biophysics and drug  
600 discovery activities at Dundee are supported by Wellcome Trust strategic awards  
601 (100476/Z/12/Z and 094090/Z/10/Z, respectively). W.K. was supported by a PhD  
602 Scholarship by the School of Life Sciences at the University of Dundee. We thank P. Fyfe  
603 for support with in-house X-ray facilities, the Diamond Light Source for beamtime (BAG  
604 proposals MX14980-13 and MX14980-20) and P. Romano and P. Aller for support at  
605 beamlines.

606

607 **Competing interests:** The A.C. laboratory receives sponsored research support from  
608 Boehringer Ingelheim and Nurix, Inc. A.C. is a scientific founder, director and shareholder  
609 of Amphista Therapeutics, a company that is developing targeted protein degradation  
610 therapeutic platforms.



## 611 References

- 612 1. Sato, N. & Miyajima, A. Multimeric cytokine receptors: common versus specific  
613 functions. *Curr. Opin. Cell Biol.* **6**, 174–179 (1994).
- 614 2. Starr, R. *et al.* A family of cytokine-inducible inhibitors of signalling. *Nature* **387**, 917–  
615 921 (1997).
- 616 3. Bullock, A. N., Debreczeni, J. E., Edwards, A. M., Sundstrom, M. & Knapp, S.  
617 Crystal structure of the SOCS2-elongin C-elongin B complex defines a prototypical  
618 SOCS box ubiquitin ligase. *Proc. Natl. Acad. Sci.* **103**, 7637–7642 (2006).
- 619 4. Yoshimura, a *et al.* A novel cytokine-inducible gene CIS encodes an SH2-containing  
620 protein that binds to tyrosine-phosphorylated interleukin 3 and erythropoietin  
621 receptors. *EMBO J.* **14**, 2816–2826 (1995).
- 622 5. Kamura, T. *et al.* The Elongin BC complex interacts with the conserved SOCS-box  
623 motif present in members of the SOCS, ras, WD-40 repeat, and ankyrin repeat  
624 families. *Genes Dev.* **12**, 3872–3881 (1998).
- 625 6. Zhang, J. G. *et al.* The conserved SOCS box motif in suppressors of cytokine  
626 signaling binds to elongins B and C and may couple bound proteins to proteasomal  
627 degradation. *Proc. Natl. Acad. Sci. U. S. A.* **96**, 2071–2076 (1999).
- 628 7. Kamura, T. *et al.* VHL-box and SOCS-box domains determine binding specificity for  
629 Cul2-Rbx1 and Cul5-Rbx2 modules of ubiquitin ligases. *Genes Dev.* **18**, 3055–3065  
630 (2004).
- 631 8. Piessevaux, J., Lavens, D., Peelman, F. & Tavernier, J. The many faces of the  
632 SOCS box. *Cytokine and Growth Factor Reviews* (2008).  
633 doi:10.1016/j.cytogfr.2008.08.006
- 634 9. Babon, J. J., Sabo, J. K., Zhang, J. G., Nicola, N. A. & Norton, R. S. The SOCS Box  
635 Encodes a Hierarchy of Affinities for Cullin5: Implications for Ubiquitin Ligase  
636 Formation and Cytokine Signalling Suppression. *J. Mol. Biol.* **387**, 162–174 (2009).
- 637 10. Linossi, E. M. & Nicholson, S. E. The SOCS box-adapting proteins for ubiquitination  
638 and proteasomal degradation. *IUBMB Life* **64**, 316–23 (2012).
- 639 11. Bulatov, E. & Ciulli, A. Targeting Cullin–RING E3 ubiquitin ligases for drug discovery:  
640 structure, assembly and small-molecule modulation. *Biochem. J.* **467**, 365–386  
641 (2015).
- 642 12. Yasukawa, H. The JAK-binding protein JAB inhibits Janus tyrosine kinase activity  
643 through binding in the activation loop. *EMBO J.* **18**, 1309–1320 (1999).
- 644 13. Sasaki, A. *et al.* Cytokine-inducible SH2 protein-3 (CIS3/SOCS3) inhibits Janus  
645 tyrosine kinase by binding through the N-terminal kinase inhibitory region as well as  
646 SH2 domain. *Genes to Cells* **4**, 339–351 (1999).
- 647 14. Ram, P. A. & Waxman, D. J. SOCS/CIS protein inhibition of growth hormone-  
648 stimulated STAT5 signaling by multiple mechanisms. *J. Biol. Chem.* **274**, 35553–  
649 35561 (1999).

- 650 15. Vesterlund, M. *et al.* The SOCS2 ubiquitin ligase complex regulates growth hormone  
651 receptor levels. *PLoS One* **6**, (2011).
- 652 16. Piessevaux, J., De Ceuninck, L., Catteeuw, D., Peelman, F. & Tavernier, J. Elongin  
653 B/C recruitment regulates substrate binding by CIS. *J. Biol. Chem.* (2008).  
654 doi:10.1074/jbc.M803742200
- 655 17. Liao, N. P. D. *et al.* The molecular basis of JAK/STAT inhibition by SOCS1. *Nat.*  
656 *Commun.* (2018). doi:10.1038/s41467-018-04013-1
- 657 18. Babon, J. J. *et al.* The Structure of SOCS3 Reveals the Basis of the Extended SH2  
658 Domain Function and Identifies an Unstructured Insertion That Regulates Stability.  
659 *Mol. Cell* **22**, 205–216 (2006).
- 660 19. Bergamin, E., Wu, J. & Hubbard, S. R. Structural Basis for Phosphotyrosine  
661 Recognition by Suppressor of Cytokine Signaling-3. *Structure* **14**, 1285–1292  
662 (2006).
- 663 20. Kershaw, N. J. *et al.* SOCS3 binds specific receptor-JAK complexes to control  
664 cytokine signaling by direct kinase inhibition. *Nat. Struct. Mol. Biol.* **20**, 469–476  
665 (2013).
- 666 21. Zadjali, F. *et al.* Structural basis for c-KIT inhibition by the suppressor of cytokine  
667 signaling 6 (SOCS6) ubiquitin ligase. *J. Biol. Chem.* **286**, 480–490 (2011).
- 668 22. Haan, S. SOCS2 physiological and pathological functions. *Front. Biosci.* **8**, 760  
669 (2016).
- 670 23. Keating, N. & Nicholson, S. E. SOCS-mediated immunomodulation of natural killer  
671 cells. *Cytokine* (2018). doi:10.1016/j.cyto.2018.03.033
- 672 24. Turnley, A. M. Role of SOCS2 in growth hormone actions. *Trends in Endocrinology*  
673 *and Metabolism* (2005). doi:10.1016/j.tem.2005.01.006
- 674 25. Rico-Bautista, E., Flores-Morales, A. & Fernández-Pérez, L. Suppressor of cytokine  
675 signaling (SOCS) 2, a protein with multiple functions. *Cytokine Growth Factor Rev.*  
676 (2006). doi:10.1016/j.cytogfr.2006.09.008
- 677 26. Metcalf, D. *et al.* Gigantism in mice lacking suppressor of cytokine signalling-2.  
678 *Nature* **405**, 1069–1073 (2000).
- 679 27. Greenhalgh, C. J. *et al.* Biological evidence that SOCS-2 can act either as an  
680 enhancer or suppressor of growth hormone signaling. *J. Biol. Chem.* **277**, 40181–  
681 40184 (2002).
- 682 28. Tannahill, G. M. *et al.* SOCS2 Can Enhance Interleukin-2 (IL-2) and IL-3 Signaling  
683 by Accelerating SOCS3 Degradation. *Mol. Cell. Biol.* **25**, 9115–9126 (2005).
- 684 29. Piessevaux, J. *et al.* Functional cross-modulation between SOCS proteins can  
685 stimulate cytokine signaling. *J. Biol. Chem.* **281**, 32953–32966 (2006).
- 686 30. Greenhalgh, C. J. *et al.* SOCS2 negatively regulates growth hormone action in vitro  
687 and in vivo. *J. Clin. Invest.* **115**, 397–406 (2005).

- 688 31. Greenhalgh, C. J. *et al.* Growth Enhancement in Suppressor of Cytokine Signaling 2  
689 (SOCS-2)-Deficient Mice Is Dependent on Signal Transducer and Activator of  
690 Transcription 5b (STAT5b). *Mol. Endocrinol.* **16**, 1394–1406 (2002).
- 691 32. Hansen, J. a, Lindberg, K., Hilton, D. J., Nielsen, J. H. & Billestrup, N. Mechanism of  
692 inhibition of growth hormone receptor signaling by suppressor of cytokine signaling  
693 proteins. *Mol. Endocrinol.* **13**, 1832–1843 (1999).
- 694 33. Stofega, M. R., Herrington, J., Billestrup, N. & Carter-Su, C. Mutation of the SHP-2  
695 binding site in growth hormone (GH) receptor prolongs GH-promoted tyrosyl  
696 phosphorylation of GH receptor, JAK2, and STAT5B. *Mol. Endocrinol.* **14**, 1338–  
697 1350 (2000).
- 698 34. Bulatov, E. *et al.* Biophysical Studies on Interactions and Assembly of Full-size E3  
699 Ubiquitin Ligase. *J. Biol. Chem.* **290**, 4178–4191 (2015).
- 700 35. Bullock, A. N., Rodriguez, M. C., Debreczeni, J. É., Songyang, Z. & Knapp, S.  
701 Structure of the SOCS4-ElonginB/C Complex Reveals a Distinct SOCS Box  
702 Interface and the Molecular Basis for SOCS-Dependent EGFR Degradation.  
703 *Structure* **15**, 1493–1504 (2007).
- 704 36. Yang, X. O. *et al.* The signaling suppressor CIS controls proallergic T cell  
705 development and allergic airway inflammation. *Nat. Immunol.* **14**, 732–740 (2013).
- 706 37. Eyckerman, S. *et al.* Design and application of a cytokine-receptor-based interaction  
707 trap. *Nat. Cell Biol.* **3**, 1114–1119 (2001).
- 708 38. Lavens, D. A complex interaction pattern of CIS and SOCS2 with the leptin receptor.  
709 *J. Cell Sci.* **119**, 2214–2224 (2006).
- 710 39. Goldshmit, Y., Walters, C. E., Scott, H. J., Greenhalgh, C. J. & Turnley, A. M.  
711 SOCS2 induces neurite outgrowth by regulation of epidermal growth factor receptor  
712 activation. *J. Biol. Chem.* (2004). doi:10.1074/jbc.M312873200
- 713 40. Dey, B. R., Spence, S. L., Nissley, P. & Furlanetto, R. W. Interaction of Human  
714 Suppressor of Cytokine Signaling (SOCS)-2 with the Insulin-like Growth Factor-I  
715 Receptor. *J. Biol. Chem.* **273**, 24095–24101 (1998).
- 716 41. Goldschmidt, L., Cooper, D. R., Derewenda, Z. S. & Eisenberg, D. Toward rational  
717 protein crystallization: A Web server for the design of crystallizable protein variants.  
718 *Protein Sci.* **16**, 1569–1576 (2007).
- 719 42. Gadd, M. S., Bulatov, E. & Ciulli, A. Serendipitous SAD solution for DMSO-Soaked  
720 SOCS2-ElonginC-ElonginB crystals using covalently incorporated dimethylarsenic:  
721 Insights into substrate receptor conformational flexibility in cullin RING ligases. *PLoS*  
722 *One* **10**, (2015).
- 723 43. Kim, Y. K. *et al.* Structural basis of intersubunit recognition in elongin BC-cullin 5-  
724 SOCS box ubiquitin-protein ligase complexes. *Acta Crystallogr. Sect. D Biol.*  
725 *Crystallogr.* **69**, 1587–1597 (2013).
- 726 44. Liu, J. & Nussinov, R. The mechanism of ubiquitination in the cullin-RING E3 ligase  
727 machinery: Conformational control of substrate orientation. *PLoS Comput. Biol.* **5**,  
728 (2009).

- 729 45. Kaneko, T. *et al.* Loops govern SH2 domain specificity by controlling access to  
730 binding pockets. *Sci. Signal.* **3**, (2010).
- 731 46. Carr, H. & Purcell, E. Effects of Diffusion on Free Precession in Nuclear Magnetic  
732 Resonance Experiments. *Phys. Rev.* **94**, 630–638 (1954).
- 733 47. Meiboom, S., Gill, D. & Gillt, D. Modified Spin-Echo Method for Measuring Nuclear  
734 Relaxation Times Modified Spin-Echo Method for Measuring Nuclear Relaxation  
735 Times\*. *Cit. Rev. Sci. Instruments J. Chem. Phys. J. Appl. Phys. J. Chem. Phys. J.*  
736 *Appl. Phys. Spin-Echo Method Meas. Relax. Times Two-Line NMR Spectra Rev.*  
737 *Sci. Instrum* **29**, 214504–2174 (1958).
- 738 48. Dalvit, C., Fagerness, P. E., Hadden, D. T. A., Sarver, R. W. & Stockman, B. J.  
739 Fluorine-NMR experiments for high-throughput screening: Theoretical aspects,  
740 practical considerations, and range of applicability. *J. Am. Chem. Soc.* **125**, 7696–  
741 7703 (2003).
- 742 49. Wang, Y. Sen, Liu, D. & Wyss, D. F. Competition STD NMR for the detection of  
743 high-affinity ligands and NMR-based screening. *Magn. Reson. Chem.* **42**, 485–489  
744 (2004).
- 745 50. Forbes, S. A. *et al.* COSMIC: Somatic cancer genetics at high-resolution. *Nucleic*  
746 *Acids Res.* **45**, D777–D783 (2017).
- 747 51. Zhang, Y. *et al.* Simultaneous binding of two peptidyl ligands by a Src homology 2  
748 domain. *Biochemistry* **50**, 7637–7646 (2011).
- 749 52. Mészáros, B., Kumar, M., Gibson, T. J., Uyar, B. & Dosztányi, Z. Degrons in cancer.  
750 *Science Signaling* **10**, (2017).
- 751 53. Liu, C. *et al.* Control of  $\beta$ -catenin phosphorylation/degradation by a dual-kinase  
752 mechanism. *Cell* (2002). doi:10.1016/S0092-8674(02)00685-2
- 753 54. Alexander, W. S. & Hilton, D. J. The Role of Suppressors of Cytokine Signaling  
754 (SOCS) Proteins in Regulation of the Immune Response. *Annu. Rev. Immunol.* **22**,  
755 503–529 (2004).
- 756 55. Yoshimura, A., Naka, T. & Kubo, M. SOCS proteins, cytokine signalling and immune  
757 regulation. *Nature Reviews Immunology* **7**, 454–465 (2007).
- 758 56. Linossi, E. M., Babon, J. J., Hilton, D. J. & Nicholson, S. E. Suppression of cytokine  
759 signaling: The SOCS perspective. *Cytokine and Growth Factor Reviews* **24**, 241–  
760 248 (2013).
- 761 57. Galic, S., Sachithanandan, N., Kay, T. W. & Steinberg, G. R. Suppressor of cytokine  
762 signalling (SOCS) proteins as guardians of inflammatory responses critical for  
763 regulating insulin sensitivity. *Biochem. J.* **461**, 177–188 (2014).
- 764 58. Inagaki-Ohara, K., Kondo, T., Ito, M. & Yoshimura, A. SOCS, inflammation, and  
765 cancer. *JAK-STAT* **2**, e24053 (2013).
- 766 59. Wikman, H. *et al.* Identification of differentially expressed genes in pulmonary  
767 adenocarcinoma by using cDNA array. *Oncogene* **21**, 5804–5813 (2002).

- 768 60. Sutherland, K. D. *et al.* Differential hypermethylation of SOCS genes in ovarian and  
769 breast carcinomas. *Oncogene* **23**, 7726–7733 (2004).
- 770 61. Farabegoli, F., Ceccarelli, C., Santini, D. & Taffurelli, M. Suppressor of cytokine  
771 signalling 2 (SOCS-2) expression in breast carcinoma. *J. Clin. Pathol.* **58**, 1046–  
772 1050 (2005).
- 773 62. Qiu, X. *et al.* Reduced expression of SOCS2 and SOCS6 in hepatocellular  
774 carcinoma correlates with aggressive tumor progression and poor prognosis. *Mol.*  
775 *Cell. Biochem.* **378**, 99–106 (2013).
- 776 63. Zhu, J. G. *et al.* Expression of SOCSs in human prostate cancer and their  
777 association in prognosis. *Mol. Cell. Biochem.* **381**, 51–59 (2013).
- 778 64. Haffner, M. C. *et al.* Favorable prognostic value of SOCS2 and IGF-I in breast  
779 cancer. *BMC Cancer* **7**, (2007).
- 780 65. Paul, I. *et al.* The ubiquitin ligase Cullin5 SOCS2 regulates NDR1/STK38 stability  
781 and NF- $\kappa$ B transactivation. *Sci. Rep.* **7**, (2017).
- 782 66. Oeckinghaus, A. & Ghosh, S. The NF-kappaB family of transcription factors and its  
783 regulation. *Cold Spring Harbor perspectives in biology* **1**, (2009).
- 784 67. Hoesel, B. & Schmid, J. A. The complexity of NF- $\kappa$ B signaling in inflammation and  
785 cancer. *Molecular Cancer* **12**, (2013).
- 786 68. Hughes, S. J. & Ciulli, A. Molecular recognition of ternary complexes: a new  
787 dimension in the structure-guided design of chemical degraders. *Essays Biochem.*  
788 **61**, 505–516 (2017).
- 789 69. Lucas, X. & Ciulli, A. Recognition of substrate degrons by E3 ubiquitin ligases and  
790 modulation by small-molecule mimicry strategies. *Current Opinion in Structural*  
791 *Biology* **44**, 101–110 (2017).
- 792 70. Ottis, P. & Crews, C. M. Proteolysis-Targeting Chimeras: Induced Protein  
793 Degradation as a Therapeutic Strategy. *ACS Chem. Biol.* **12**, 892–898 (2017).
- 794 71. Zengerle, M., Chan, K. H. & Ciulli, A. Selective Small Molecule Induced Degradation  
795 of the BET Bromodomain Protein BRD4. *ACS Chem. Biol.* **10**, 1770–1777 (2015).
- 796 72. Maniaci, C. *et al.* Homo-PROTACs: bivalent small-molecule dimerizers of the VHL  
797 E3 ubiquitin ligase to induce self-degradation. *Nat. Commun.* **8**, 830 (2017).
- 798 73. Winter, G. E. *et al.* Phthalimide conjugation as a strategy for in vivo target protein  
799 degradation. *Science (80-. )*. **348**, 1376 LP-1381 (2015).
- 800 74. Lu, J. *et al.* Hijacking the E3 Ubiquitin Ligase Cereblon to Efficiently Target BRD4.  
801 *Chem. Biol.* **22**, 755–763 (2015).
- 802 75. Kabsch, W. XDS. *Acta Crystallogr. Sect. D Biol. Crystallogr.* **66**, 125–132 (2010).
- 803 76. Evans, P. R. & Murshudov, G. N. How good are my data and what is the resolution?  
804 *Acta Crystallogr. Sect. D Biol. Crystallogr.* **69**, 1204–1214 (2013).
- 805 77. Winn, M. D. *et al.* Overview of the CCP4 suite and current developments. *Acta*



- 806            *Crystallographica Section D: Biological Crystallography* **67**, 235–242 (2011).
- 807    78.    McCoy, A. J., Storoni, L. C. & Read, R. J. Simple algorithm for a maximum-likelihood  
808            SAD function. *Acta Crystallogr. Sect. D Biol. Crystallogr.* **60**, 1220–1228 (2004).
- 809    79.    McCoy, A. J. *et al.* Phaser crystallographic software. *J. Appl. Crystallogr.* **40**, 658–  
810            674 (2007).
- 811    80.    Adams, P. D. *et al.* PHENIX: A comprehensive Python-based system for  
812            macromolecular structure solution. *Acta Crystallogr. Sect. D Biol. Crystallogr.* **66**,  
813            213–221 (2010).
- 814    81.    Terwilliger, T. C. *et al.* Iterative model building, structure refinement and density  
815            modification with the PHENIX AutoBuild wizard. in *Acta Crystallographica Section D:*  
816            *Biological Crystallography* **64**, 61–69 (2007).
- 817    82.    Emsley, P., Lohkamp, B., Scott, W. G. & Cowtan, K. Features and development of  
818            Coot. *Acta Crystallogr. Sect. D Biol. Crystallogr.* **66**, 486–501 (2010).
- 819    83.    Murshudov, G. N. *et al.* REFMAC5 for the refinement of macromolecular crystal  
820            structures. *Acta Crystallogr. Sect. D Biol. Crystallogr.* **67**, 355–367 (2011).
- 821    84.    Chao, H. G. *et al.* Synthesis and Application of Fmoc-O-  
822            [bis(dimethylamino)phosphono]-tyrosine, a Versatile Protected Phosphotyrosine  
823            Equivalent. *J. Org. Chem.* (1995). doi:10.1021/jo00129a001
- 824    85.    Biosystems, A. Cleavage, Deprotection, and Isolation of Peptides after Fmoc  
825            Synthesis. *Tech. Bull.* 1–12 (1998). doi:10.1038/nrd.2016.29
- 826    86.    Perich, J. W. & Reynolds, E. C. The Facile One-Pot Synthesis of N $\alpha$ -(9-  
827            Fluorenylmethoxycarbonyl)-O-(O', O''-dialkylphosphoro)-L-tyrosines Using Dialkyl  
828            N,N-Diethylphosphoramidites. *Synlett* **1991**, 577–578 (1991).
- 829    87.    Armougom, F. *et al.* Espresso: Automatic incorporation of structural information in  
830            multiple sequence alignments using 3D-Coffee. *Nucleic Acids Res.* (2006).  
831            doi:10.1093/nar/gkl092
- 832
- 833



834 **Figures and Schemes**

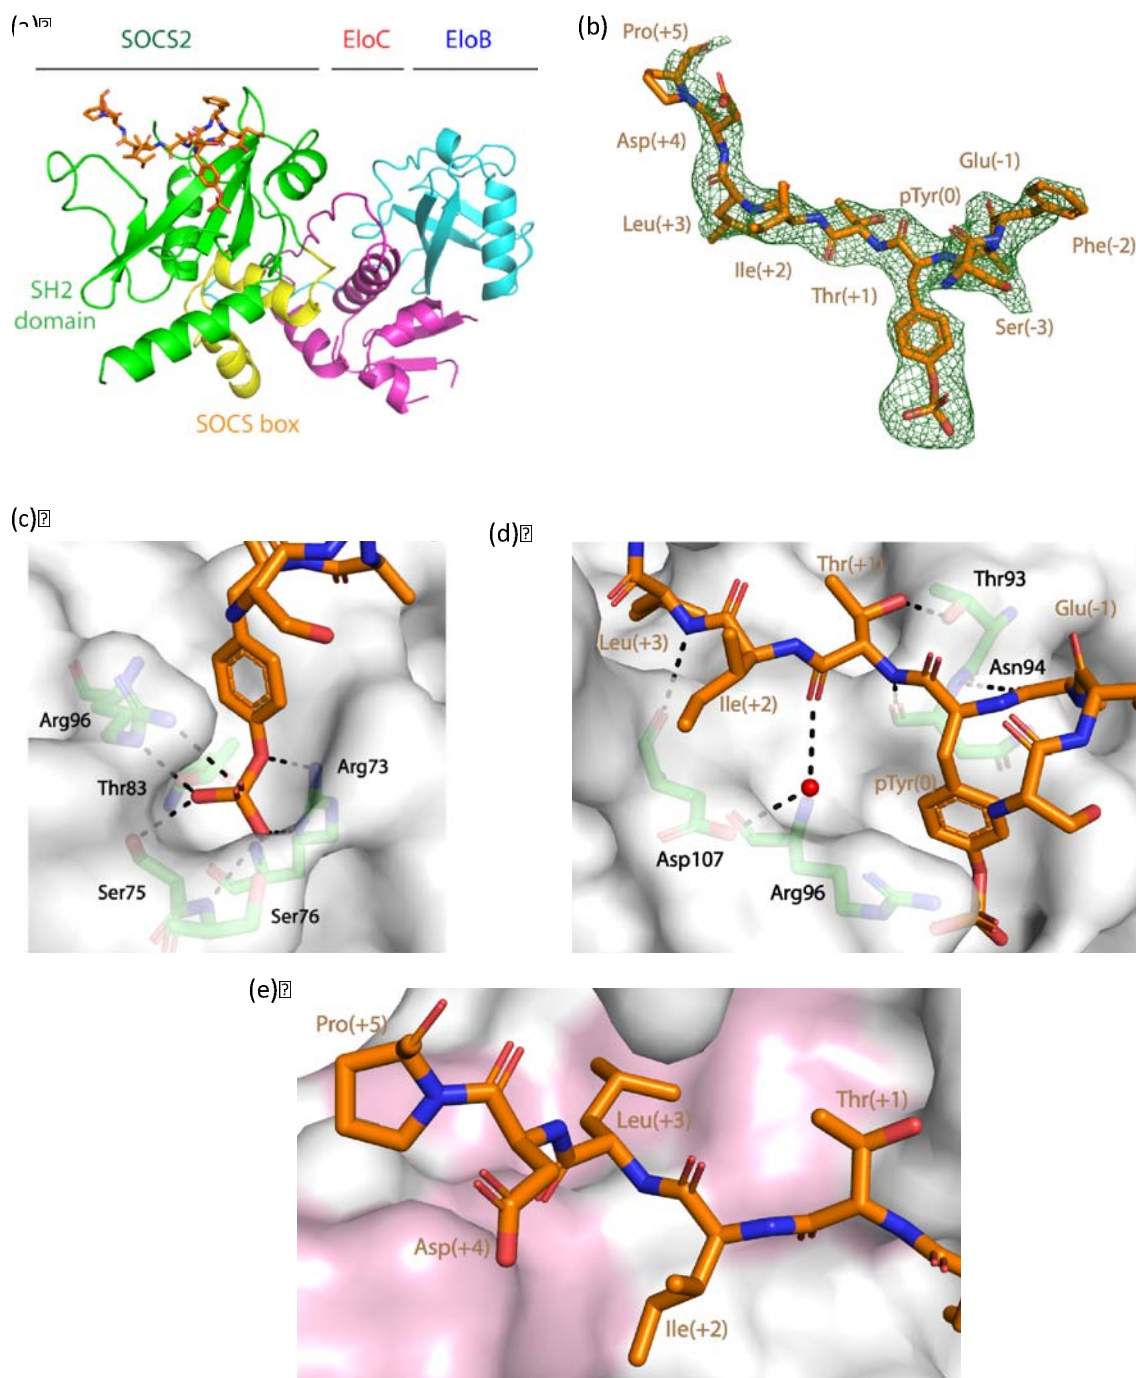

835

836 **Figure 1. Structural and interaction detail of the SBC-EpoR co-crystal**

837 (a) Domain and protein arrangement of the SBC-EpoR co-crystal. Protein chains are shown in  
 838 cartoon, with EloB (cyan), EloC (magenta) and SOCS2, comprising of SOCS box (yellow) and SH2  
 839 domain (green). The EpoR\_pY426 peptide is shown in orange stick. (b) The Fo-Fc ligand omit map  
 840 of the EpoR\_pY426 peptide (green mesh) contoured at 2.0  $\sigma$  level to highlight densities for the  
 841 EpoR\_pY426 peptide (orange stick) (c) Hydrogen bond interactions (dash) between the pY of  
 842 EpoR\_pY426 peptide (orange stick) and SOCS2 (green). (d) Hydrogen bond interaction (dash)  
 843 between the EpoR\_pY426 peptide (orange stick), SOCS2 (green stick) and water (red sphere). (e)  
 844 Hydrophobic interaction between EpoR\_pY426 peptide (orange stick) and SOCS2 (surface).  
 845 Hydrophobic residues on SOCS2 are colored in pink.

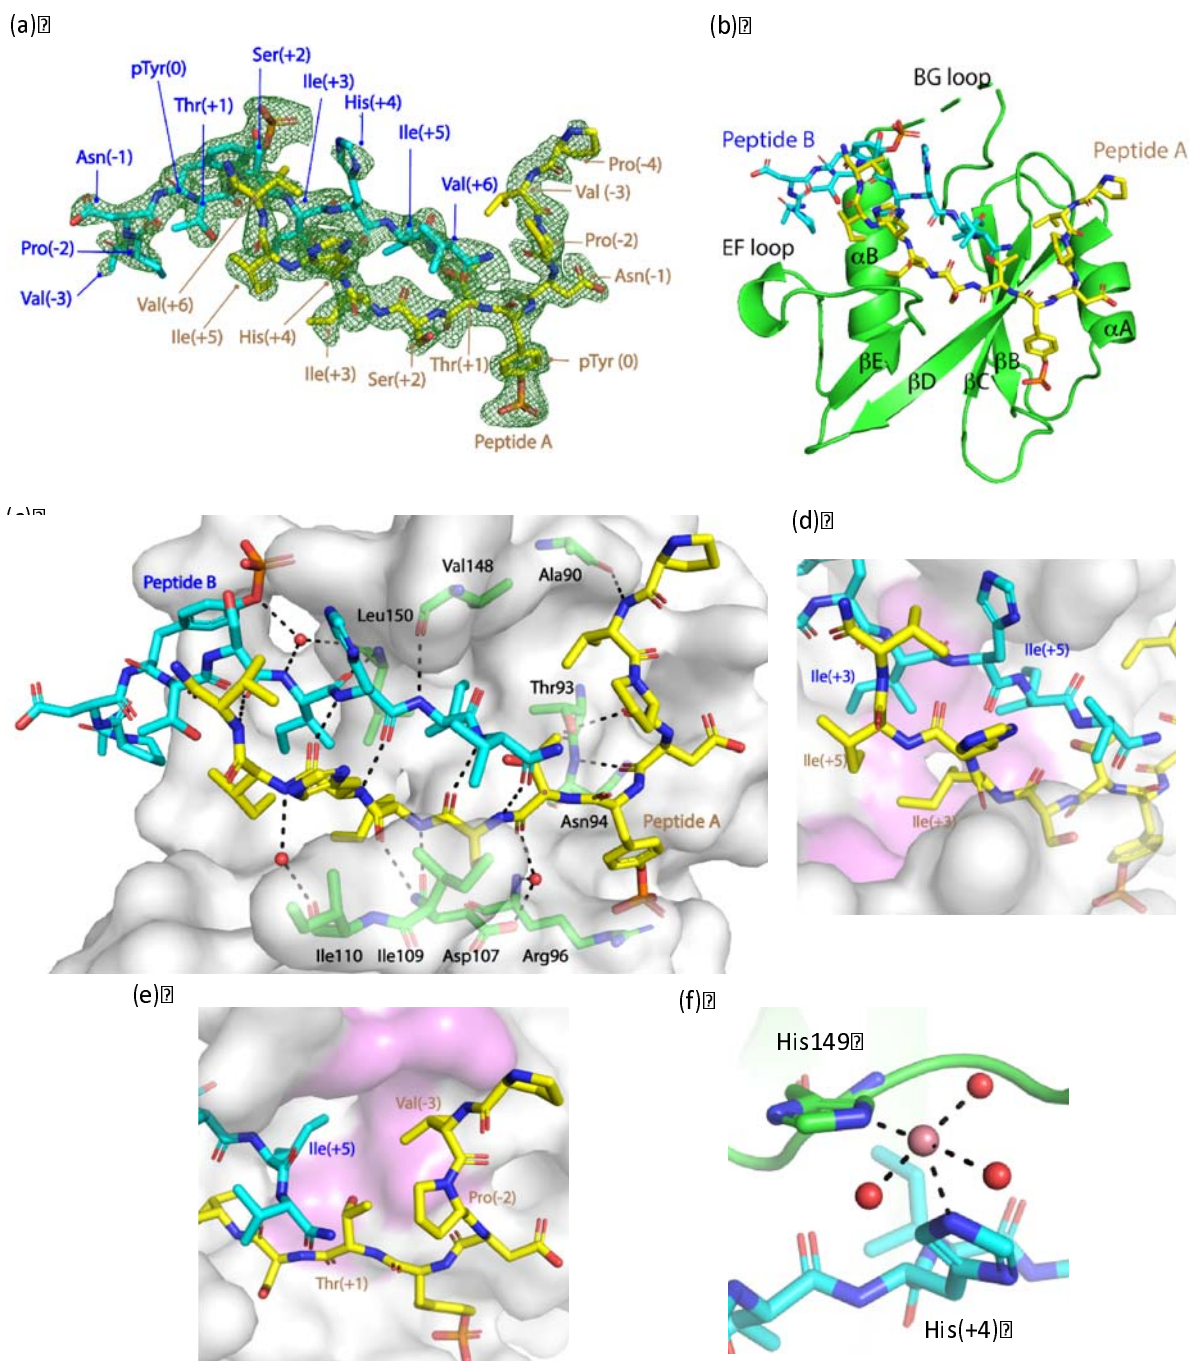

846

847 **Figure 2. Structural and interaction detail of the SBC-GHR co-crystal**

848 Two copies of GHR\_pY595 were observed in the co-crystal. One copy is shown as peptide  
 849 A (yellow stick) and the other one as peptide B (cyan stick). (a) The Fo-Fc ligand omit map  
 850 of the peptides (green mesh) contoured at 2.5  $\sigma$  level to highlight densities for the peptide  
 851 A and peptide B (yellow and cyan stick). (b) Cartoon diagram of the SH2 domain of  
 852 SOCS2 (green) with peptides A and peptide B. (c) Hydrogen bond interactions (dash)  
 853 among peptide A, peptide B, SOCS2 (green stick) and water (red sphere). (d) (d)(e)  
 854 Hydrophobic interaction of the peptides with C-terminal half and N-terminal half of the SH2  
 855 domain (surface), respectively. SOCS2 residues involved in hydrophobic interactions are  
 856 coloured in pink. (f) The coordination of cobalt ion (pink sphere) with His149 of SOCS2  
 857 (green), His(+4) of peptide B and water molecules (red sphere).

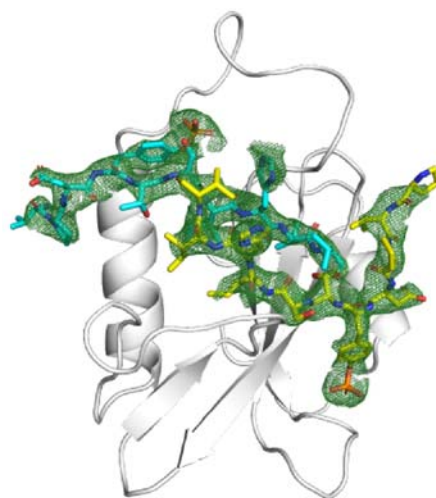

858

859 **Figure 3. Structural detail of the SBC-GHR<sub>2</sub> co-crystal**

860 The Fo-Fc ligand omit map of the GHR peptides (green mesh) contoured at 2.5  $\sigma$  level to  
861 highlight densities for the GHR\_pY595 peptides (yellow and cyan stick).

862



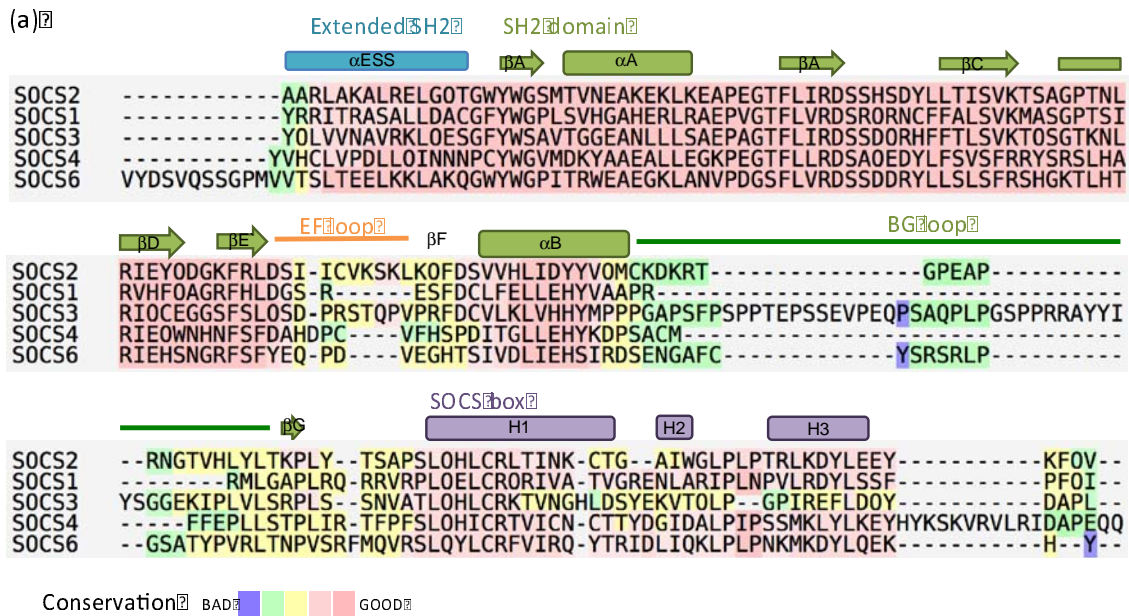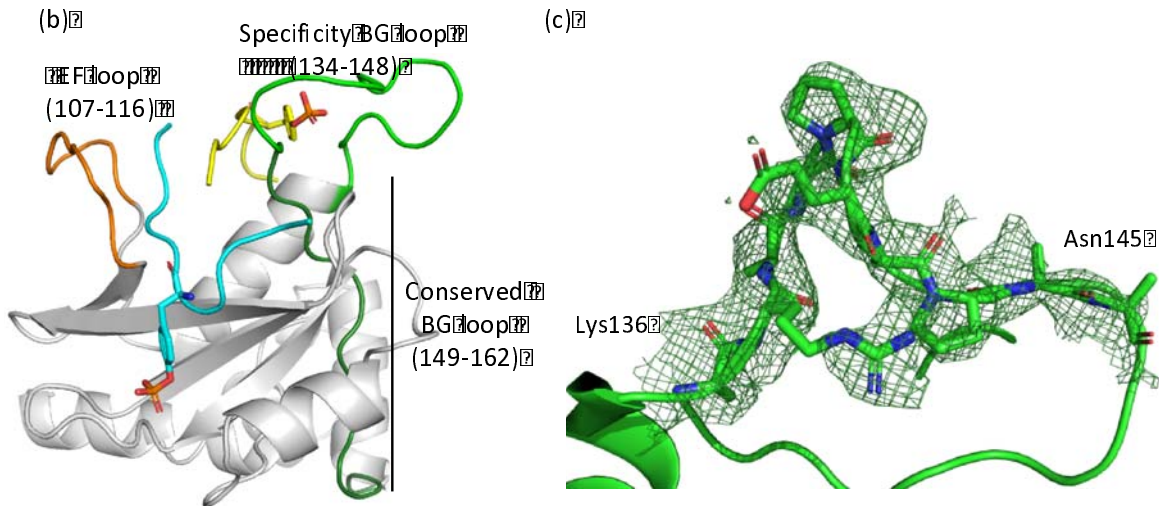

863

864 **Figure 4. The BG loop of SOCS2**

865 (a) Secondary structure elements in SOCS2 are shown above the sequence alignment.  
 866 SOCS proteins with structure available were aligned using T-Coffee expresso mode for  
 867 sequence alignment with structural information<sup>87</sup>. (b) Locations of the EF loop (orange)  
 868 and the BG loop (green) on SOCS2 (white). (c) The Fo-Fc ligand omit map of the  
 869 previously disordered BG loop (green mesh) contoured at 1.5  $\sigma$  level.  
 870

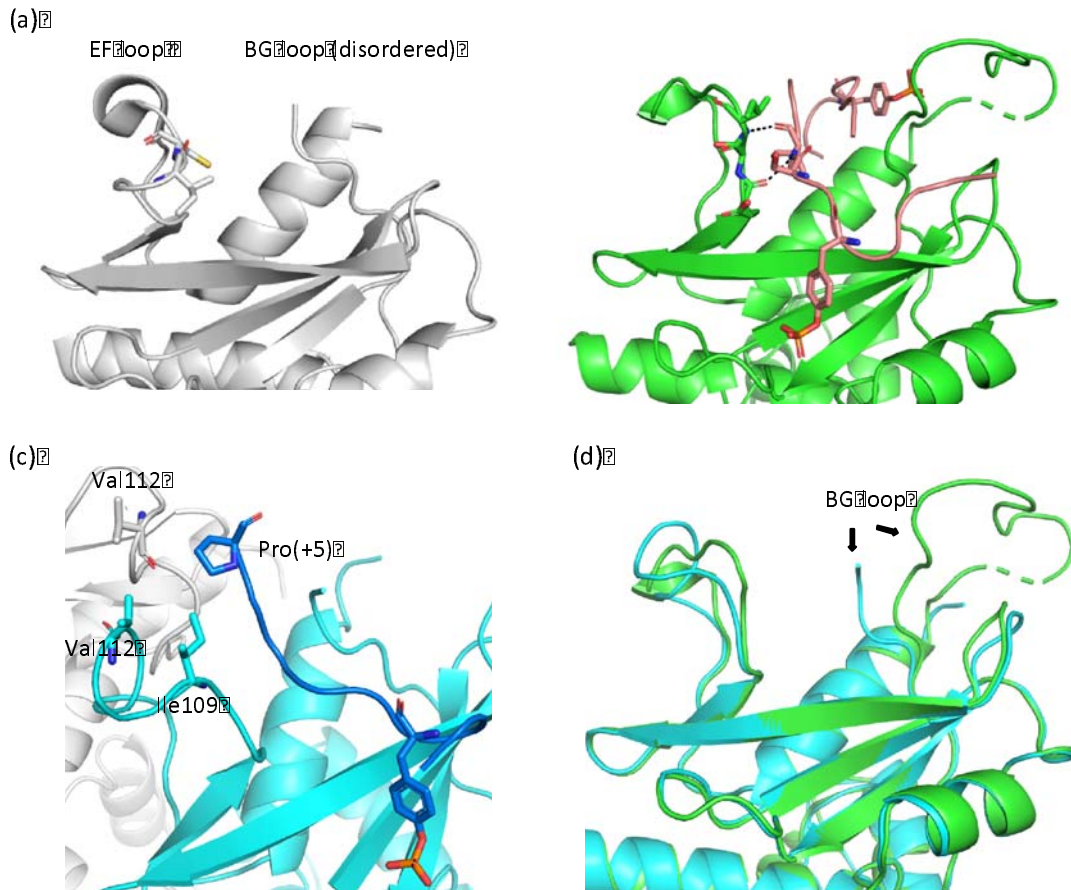

871

872 **Figure 5. Conformation changes of the EF and BG loops**

873 (a) The EF loop curls up in the apo SOCS2 (white, PDB code: 2C9W), placing Ile110 and  
874 Cys111 (stick) at the SH2 hydrophobic pocket. (b) The EF loop makes backbone  
875 interactions with GHR peptide (pink) in the SBC-GHR<sub>2</sub> structure. (c) The Ile109 and Val  
876 112 of SCOS2 (cyan) and Val112 of SOCS2 symmetry mate (white) make unique  
877 hydrophobic interaction with Pro(+5) of EpoR peptide (blue). (d) Superposition of the  
878 SOCS2 from SBC-GHR<sub>2</sub> (green) and SBC-EpoR (cyan) displays conformational changes  
879 of the BG loop.

880

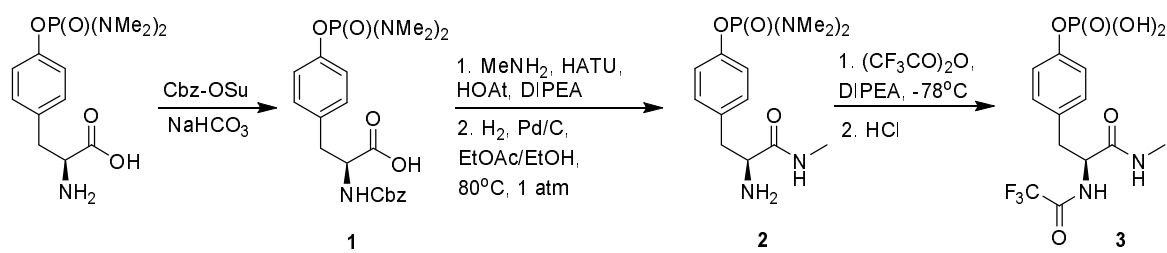



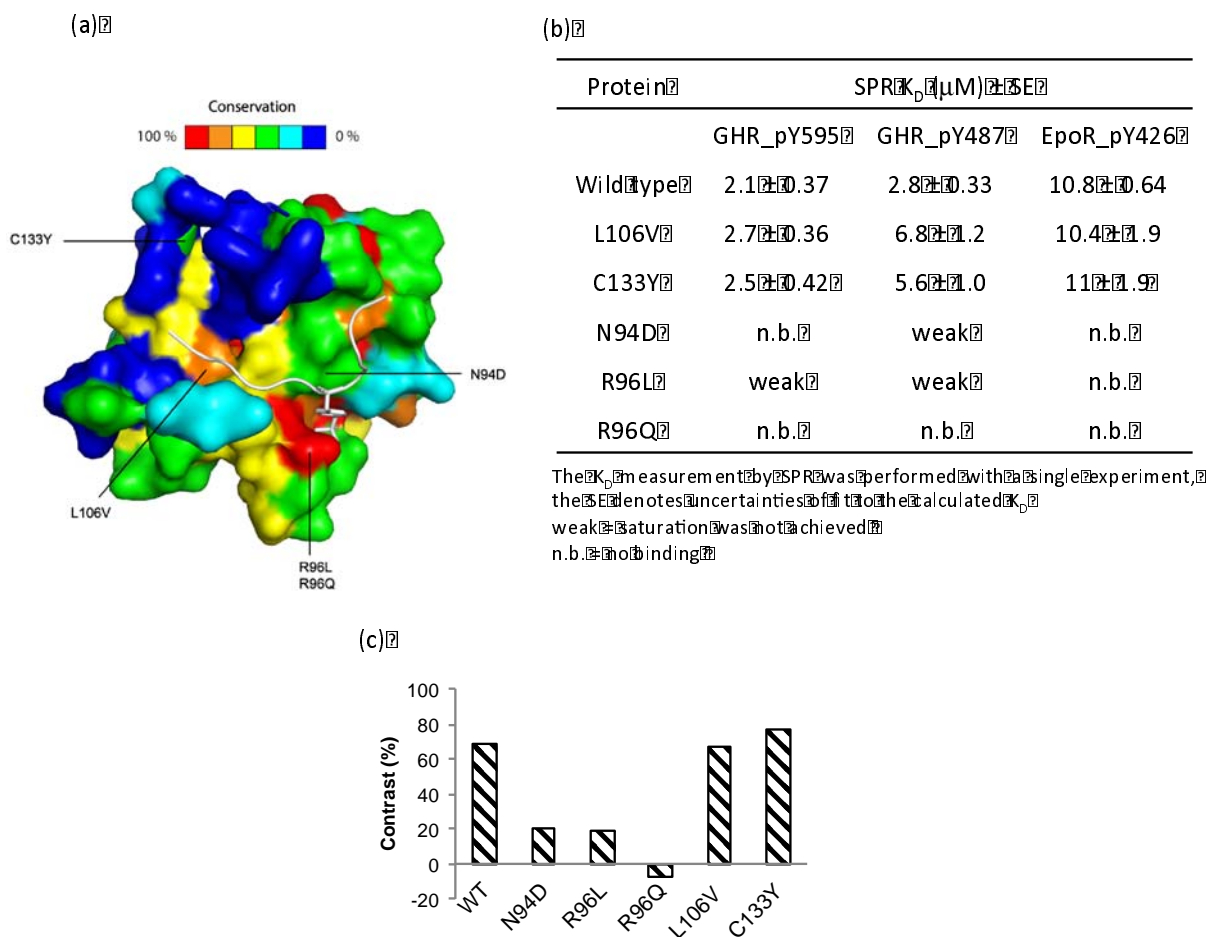

884

885 **Figure 6. Characterization of SNP containing SOCS2 by SPR and  $^{19}$ F-NMR**

886 (a) Sequence conservation mapped onto the SH2 domain of SOCS2 surface.  
 887 Conservation surface representation based upon the ClustalW multiple sequence  
 888 alignment of CIS and SOCS1 – SOCS7 sequences where highly conserved residues are  
 889 shown in red/orange colour and variable residue positions coloured blue. (b)  $K_D$  estimation  
 890 of peptide binding against SBC proteins from SPR data. (c) Signal contrast of the spy  
 891 molecule in the absence and presence of SBC proteins.  
 892

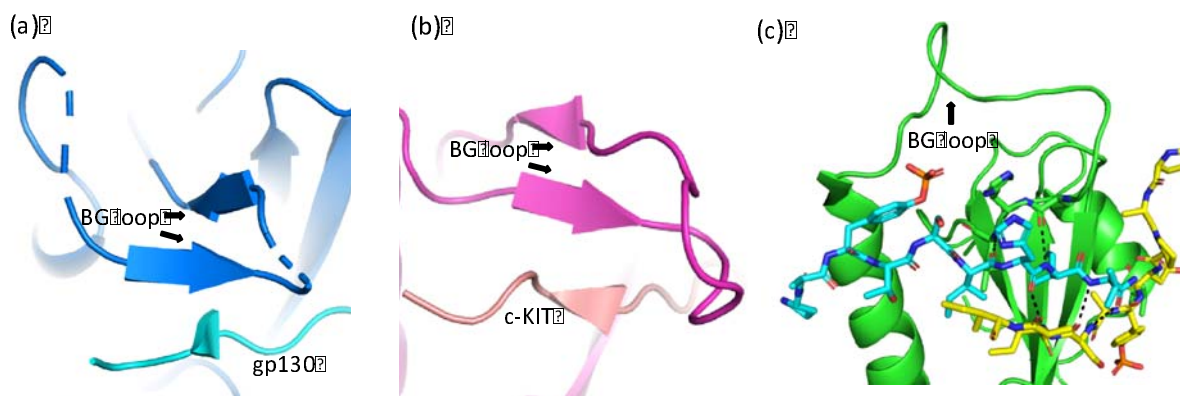

893

894 **Figure 7. The triple-stranded b-sheet interaction between substrate peptide and**  
895 **protein**

896 (a) The SOCS3 (blue) in complex with gp130 (cyan) (PDB code: 2HMH) (B) The SOCS6  
897 (magenta) in complex with c-Kit (pink) (PBD code: 2VIF) (C) The SOCS2 (green) in  
898 complex with GHR\_pY595 peptides. Peptide A is shown in yellow stick and peptide B in  
899 cyan stick.  
900

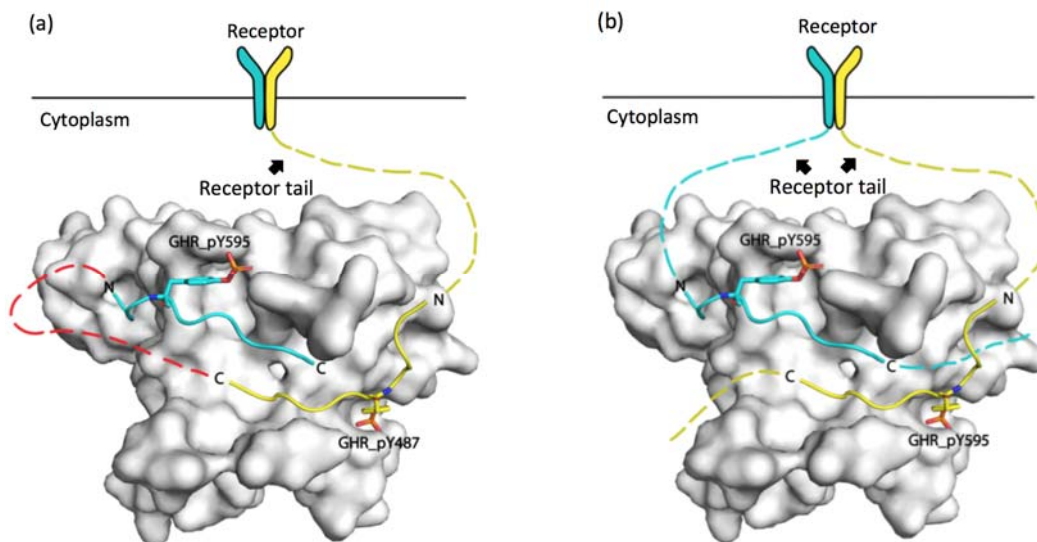

901  
902

### Figure 8. Illustration of GHR peptide binding modes

903 (a) Illustration of the “cis” recognition binding mode where the two binding sites on GHR,  
904 pY487 and pY595, folded into a hairpin structure for SOCS2 binding. SOCS2 is shown in  
905 white surface, the hairpin structure is illustrated by connecting the two peptides (yellow  
906 and cyan cartoon) with red dash lines. (b) Illustration of the “trans” binding mode where  
907 SOCS2 (white surface) could grab two receptor tails (cyan and yellow dash line) at the  
908 same time after dimerization of receptors at the membrane.

909 **Tables**

910 **Table 1. Data collection and refinement statistics**

|                                          | <b>SBC-EpoR</b>            | <b>SBC-GHR</b>                    | <b>SBC-GHR<sub>2</sub></b>        |
|------------------------------------------|----------------------------|-----------------------------------|-----------------------------------|
| <b>PDB code</b>                          | 6I4X                       | 6I5N                              | 6I5J                              |
| <b><i>Data collection</i></b>            |                            |                                   |                                   |
| Wavelength (Å)                           | 0.9686                     | 0.9795                            | 0.9686                            |
| Space group                              | I 1 2 1                    | P 2 <sub>1</sub> 2 <sub>1</sub> 2 | P 2 2 <sub>1</sub> 2 <sub>1</sub> |
| Cell dimensions                          |                            |                                   |                                   |
| <i>a</i> , <i>b</i> , <i>c</i> (Å)       | 41.29, 56.33,<br>203.39    | 113.55, 157.84,<br>57.72          | 57.83, 113.71, 156.94             |
| $\alpha$ , $\beta$ , $\gamma$ (°)        | 90.00, 91.53, 90.00        | 90.00, 90.00, 90.00               | 90.00, 90.00, 90.00               |
| Molecules/ASU                            | 1                          | 2                                 | 2                                 |
| Resolution                               | 29.36–2.69 (2.82–<br>2.69) | 113.55–1.98 (2.01–<br>1.98)       | 92.08–2.80 (2.95–<br>2.80)        |
| R <sub>merge</sub> (%)                   | 10.8 (51.4)                | 9.4 (103.5)                       | 19 (72.1)                         |
| $\langle I/\sigma(I) \rangle$            | 9.6 (2.4)                  | 17.1 (2.2)                        | 7.3 (2.7)                         |
| Completeness (%)                         | 93.2 (63.3)                | 100 (100)                         | 100 (100)                         |
| Redundancy                               | 4.9 (4.2)                  | 13.3 (13.2)                       | 7.8 (7.8)                         |
| CC <sub>1/2</sub>                        | 0.99 (0.82)                | 1.0 (0.9)                         | 0.98 (0.74)                       |
| <b><i>Refinement</i></b>                 |                            |                                   |                                   |
| Resolution (Å)                           | 2.69                       | 1.98                              | 2.8                               |
| Unique reflections                       | 12273 (1104)               | 72170(7105)                       | 26321(3761)                       |
| R <sub>work</sub> /R <sub>free</sub> (%) | 19.64/23.51                | 19.00/22.66                       | 20.96/26.38                       |
| Wilson B factor (Å <sup>2</sup> )        | 44.1                       | 24.2                              | 42.5                              |
| Average B factor (Å <sup>2</sup> )       | 46.9                       | 32.0                              | 42.5                              |
| No. non-hydrogen atoms                   | 2688/83/11                 | 6433/94/512                       | 5775/327/33                       |
| Protein/ligand/water                     |                            |                                   |                                   |
| R.M.S.D.                                 |                            |                                   |                                   |
| Bond lengths (Å)                         | 0.002                      | 0.010                             | 0.002                             |
| Bond angles (°)                          | 0.451                      | 1.02                              | 0.412                             |
| Ramachandran analysis                    |                            |                                   |                                   |
| Preferred regions (%)                    | 96.12                      | 98.00                             | 96.83                             |
| Allowed regions (%)                      | 3.58                       | 2.10                              | 3.17                              |
| Outliers (%)                             | 0.3                        | 0.00                              | 0.00                              |

911 Values in parentheses are for the highest resolution shell  
912

913

914 **Table 2. Binding affinities of the GHR peptide and Val(-3) analogues**

915

| Protein   | sequence            | K <sub>D</sub> by SPR (μM) | K <sub>D</sub> by NMR (μM) |
|-----------|---------------------|----------------------------|----------------------------|
| Wild type | PVPDYTSIHIV         | 1.3 ± 0.14                 | 1.3                        |
| V(-3)R    | <b>PR</b> PDYTSIHIV | 9.5 ± 0.43                 | 12.1                       |
| V(-3)Y    | <b>PYP</b> DYTSIHIV | 3.4 ± 0.37                 | 3.4                        |

916 Residue mutated in bold

917 The K<sub>D</sub> measurement by SPR was performed with a single experiment, the SE denotes  
918 uncertainties of fit to the calculated K<sub>D</sub>

919 The NMR was performed with a single experiment at a fixed CPMG delay, therefore no standard  
920 error can be estimated.

921

922 **Table 3.  $K_D$  measurement for the GHR\_pY595 and EpoR\_pY426 derivatives by SPR**  
 923 **and  $^{19}\text{F}$  NMR**

924

| Sequence      | Ala. position  | SPR $K_D \pm \text{SE}$<br>( $\mu\text{M}$ ) | NMR $K_D$<br>( $\mu\text{M}$ ) |
|---------------|----------------|----------------------------------------------|--------------------------------|
| PVPDpYTSIHIV  | GHR wild type  | 1.3 $\pm$ 0.14                               | 1.3                            |
| AVPDpYTSIHIV  | pY(-4)         | 2.1 $\pm$ 0.32                               | 1.2                            |
| PAPDpYTSIHIV  | pY(-3)         | 3.2 $\pm$ 0.31                               | 3.6                            |
| PVADpYTSIHIV  | pY(-2)         | 1.7 $\pm$ 0.22                               | 2.1                            |
| PVPApYTSIHIV  | pY(-1)         | 5.8 $\pm$ 0.48                               | 11.0                           |
| PVPDpYASIHIV  | pY(+1)         | 0.9 $\pm$ 0.20                               | 0.6                            |
| PVPDpYTAIHIV  | pY(+2)         | 1.3 $\pm$ 0.23                               | 1.1                            |
| PVPDpYTSAHIV  | pY(+3)         | 4.2 $\pm$ 0.38                               | 4.4                            |
| PVPDpYTSIAIV  | pY(+4)         | 4.4 $\pm$ 0.24                               | 17.3                           |
| PVPDpYTSIHAV  | pY(+5)         | 2.3 $\pm$ 0.31                               | 2.1                            |
| PVPDpYTSIHIA  | pY(+6)         | 2.0 $\pm$ 0.28                               | 1.8                            |
| ASFepYTILDPS  | EpoR wild type | 12.1 $\pm$ 0.92                              | 8.6                            |
| AAFEpYTILDPS  | pY(-3)         | 13.4 $\pm$ 0.69                              | 8.9                            |
| ASAEpYTILDPS  | pY(-2)         | 13.4 $\pm$ 0.99                              | 7.1                            |
| ASFAPpYTILDPS | pY(-1)         | 22.8 $\pm$ 1.40                              | 25.7                           |
| ASFepYAILDPS  | pY(+1)         | 16.6 $\pm$ 1.30                              | 11.6                           |
| ASFepYTALDPS  | pY(+2)         | 31.5 $\pm$ 1.1                               | 16.1                           |
| ASFepYTIADPS  | pY(+3)         | 34.5 $\pm$ 1.3                               | 18.3                           |
| ASFepYTILAPS  | pY(+4)         | 15.3 $\pm$ 1.1                               | 13.7                           |
| ASFepYTILDAS  | pY(+5)         | 5.4 $\pm$ 0.55                               | 8.2                            |
| ASFepYTILDPA  | pY(+6)         | 16.7 $\pm$ 1.50                              | 10.3                           |

925 Residue mutated in bold

926 The  $K_D$  measurement by SPR was performed with a single experiment, the SE denotes  
 927 uncertainties of fit to the calculated  $K_D$

928 The NMR was performed with a single experiment at a fixed CPMG delay, therefore no standard  
 929 error can be estimated.

930



931 **Supplementary Figures and Tables**

932

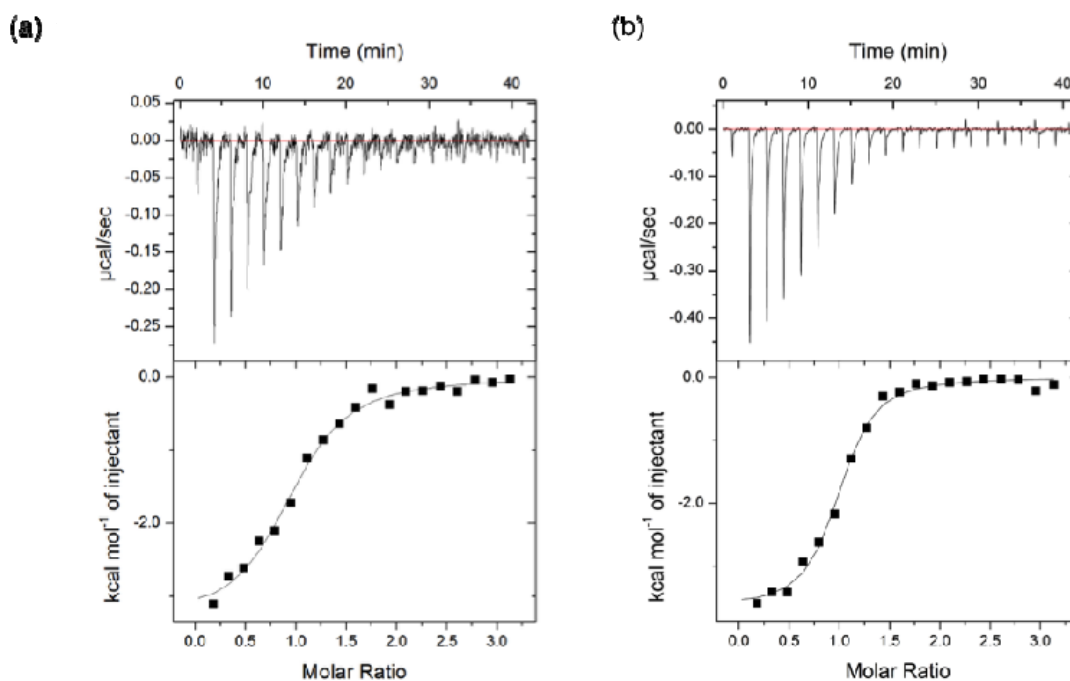

(c)

| Peptide                 | $K_D$ , $\mu\text{M}$ | $\Delta H$ , kcal/mol | $-T\Delta S$ , kcal/mol | $\Delta G$ , kcal/mol | n               |
|-------------------------|-----------------------|-----------------------|-------------------------|-----------------------|-----------------|
| EpoR_pY426 <sup>†</sup> | $4.8 \pm 0.8$         | $-3.3 \pm 0.12$       | $-3.9 \pm 0.2$          | $-7.3 \pm 0.10$       | $0.96 \pm 0.03$ |
| GHR_pY595 <sup>‡</sup>  | $1.6 \pm 0.2$         | $-3.6 \pm 0.08$       | $-4.2 \pm 0.1$          | $-7.9 \pm 0.09$       | $0.96 \pm 0.01$ |

<sup>†</sup> EpoR\_pY426, ASFepYTILDPS-amide

<sup>‡</sup> GHR\_pY595, PVPDPYTSIHIV-amide

933

934

935 **Figure S1. Biophysical characterisation of the interactions between SBC and**  
 936 **phosphorylated substrate peptides**

937

938 ITC measurement of (a) the EpoR\_pY426 peptide and (b) GHR\_pY595 peptide binding to  
 939 the SOCS2-EloB-EloC ternary (SBC) complex at 298K. (c) ITC binding data for  
 940 phosphorylated substrate peptides. Values reported are the mean  $\pm$  s.e.m. from one  
 941 measurement.

942

943

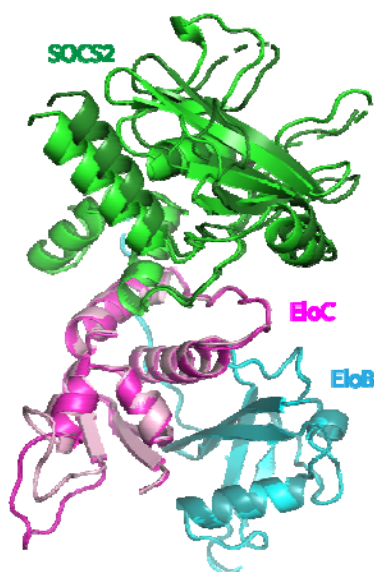

944

945 **Figure S2. The hinge motion of SOCS2**

946 Superposition of the two protomers from SBC-GHR structure via EloB (cyan and blue)  
947 backbone atom alignment. A hinge motion of SOCS2 (green and dark green) is observed.

948

949

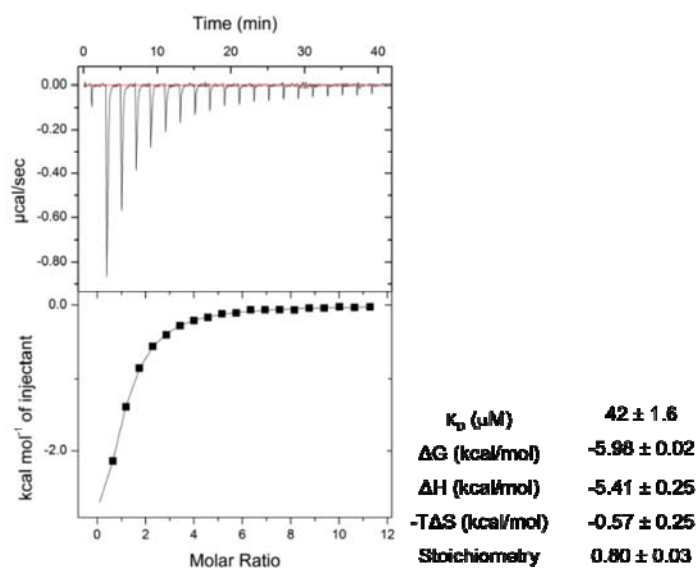

950

951 **Figure S3. Biophysical characterization of the interaction between SBC and**  
952 **phosphate 3**

953 ITC measurement was carried out at 298K. Values reported are the mean  $\pm$  s.e.m. from  
954 one measurement.

955

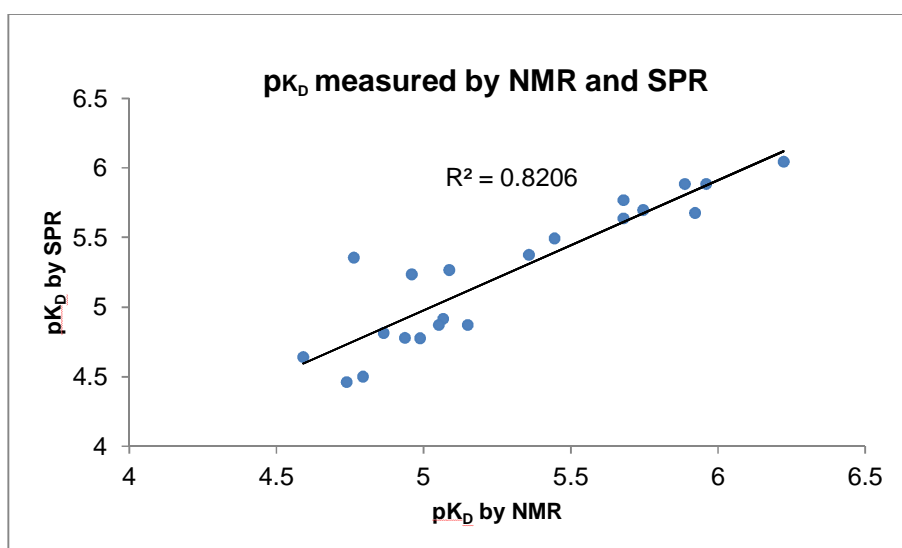

956

957 **Figure S4. Correlation of binding affinity of the alanine peptide library measured by**  
958 **<sup>19</sup>F-NMR and SPR technique**

959

960

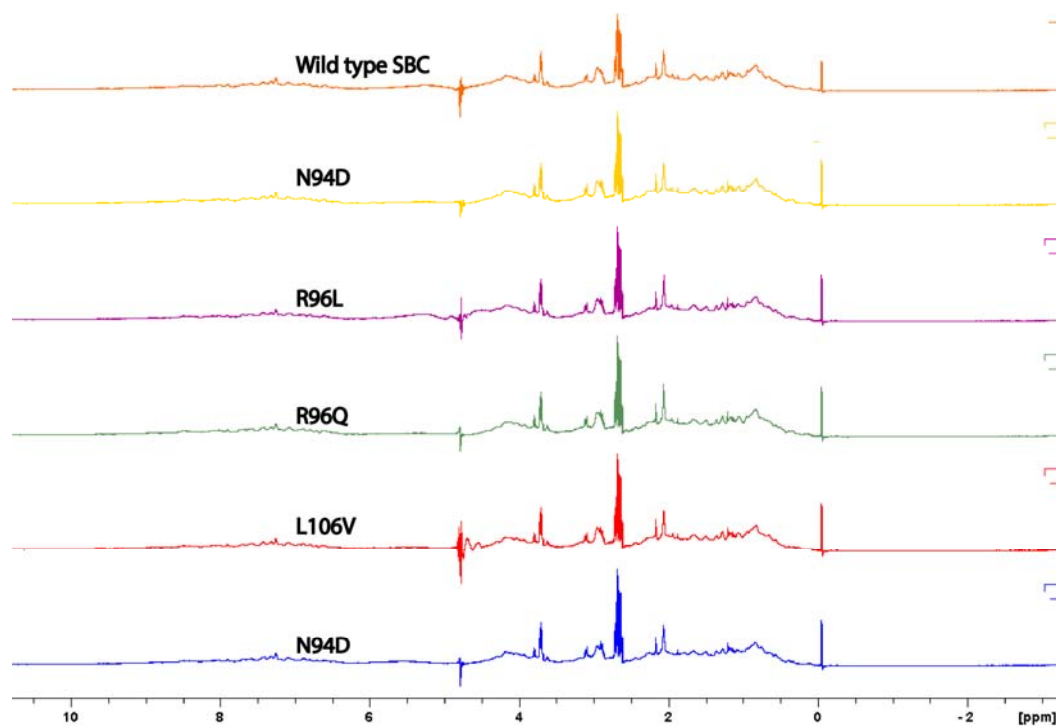

961

962 **Figure S5. The protein folding of SNPs containing SOCS2 confirmed by <sup>1</sup>H 1D NMR**

963
